# Supplementary material for: A comparative cross-sectional evaluation of the Field Epidemiology Training Program-Frontline in Ethiopia
Source: Springer Nature journal article supplement (doi:10.1186/s12889-022-13326-2), 2022-05-10
Supplement: MOESM1 [file 20389444]

## **Questionnaire for Woreda PHEM Officers**

### **Informed Consent**

You are being asked to take part in evaluation of the impact of the FETP-Frontline. The purpose of this activity is to improve the methods used to assess the impact of FETP-Frontline training on participants, public health and on the public health surveillance system of the country to improve how FETP-Frontline training will be conducted in the future. You will be asked to complete a survey that takes approximately 40 minutes to complete. There are no right or wrong answers. The survey will be anonymous, and your answers will be kept confidential and will NOT be publicly linked to you. Whenever possible, answers will be presented in aggregate form. You may decline to answer any or all questions and you may terminate your involvement at any time if you choose. There is no direct benefit to you. However, your responses will inform how Frontline training in Ethiopia will be conducted in the future. If you are willing, we will also audio-record the interview not to miss any important information.

If you have questions regarding your rights as a participant in this activity, you can discuss with the person leading this activity: Tolcha Kebebew, the Resident Advisor for FETP-Frontline at +251911450981 or the CDC Resident Advisor for Ethiopia, David Sugerman at +251-9-11-500514. Your participation in this activity is voluntary. It is up to you to decide whether to take part in this activity. If you decide to take part, please confirm your consent in the question below.

Q1. Do you understand and agree to participate in this testing activity?

Yes

No

If No, would you kindly explain why?

**Name of interviewer:**

**Interviewer signature attesting that the participant gave oral consent to participate:** \_\_\_\_\_

**Start Time:**

**End Time:**

**Questionnaire ID:** / \_\_\_\_ / \_\_\_\_ / \_\_\_\_ /

**Evaluation for FETP-Frontline in Ethiopia**

| <b>GENERAL INFORMATION</b> |                                                                                                                                                                  |                                                                                                                                                                                                                                                                                                                                                                                                                                                                                               |  |     |    |                    |  |  |        |  |  |            |  |  |                           |  |  |          |  |  |          |  |  |          |  |  |
|----------------------------|------------------------------------------------------------------------------------------------------------------------------------------------------------------|-----------------------------------------------------------------------------------------------------------------------------------------------------------------------------------------------------------------------------------------------------------------------------------------------------------------------------------------------------------------------------------------------------------------------------------------------------------------------------------------------|--|-----|----|--------------------|--|--|--------|--|--|------------|--|--|---------------------------|--|--|----------|--|--|----------|--|--|----------|--|--|
|                            | Name                                                                                                                                                             | (Removed)                                                                                                                                                                                                                                                                                                                                                                                                                                                                                     |  |     |    |                    |  |  |        |  |  |            |  |  |                           |  |  |          |  |  |          |  |  |          |  |  |
| 1.                         | What is the name of the woreda/zone/region where you work? (spell out)                                                                                           | Woreda: _____<br>Zone: _____<br>Region: _____                                                                                                                                                                                                                                                                                                                                                                                                                                                 |  |     |    |                    |  |  |        |  |  |            |  |  |                           |  |  |          |  |  |          |  |  |          |  |  |
| 2.                         | What is your gender?                                                                                                                                             | 1. Male<br>2. Female                                                                                                                                                                                                                                                                                                                                                                                                                                                                          |  |     |    |                    |  |  |        |  |  |            |  |  |                           |  |  |          |  |  |          |  |  |          |  |  |
| 3.                         | What is your age in years?                                                                                                                                       | _____ Years                                                                                                                                                                                                                                                                                                                                                                                                                                                                                   |  |     |    |                    |  |  |        |  |  |            |  |  |                           |  |  |          |  |  |          |  |  |          |  |  |
| 4.                         | What is your highest educational background?                                                                                                                     | 1. University First Degree (BSc/BA)<br>2. TVET/Diploma<br>3. Master's degree<br>4. Others (specify)                                                                                                                                                                                                                                                                                                                                                                                           |  |     |    |                    |  |  |        |  |  |            |  |  |                           |  |  |          |  |  |          |  |  |          |  |  |
| 5.                         | What is your professional background?                                                                                                                            | 1. Public Health Officer<br>2. Nurse<br>3. Environmental Health<br>4. Laboratory Technician<br>5. Other, (please specify) _____                                                                                                                                                                                                                                                                                                                                                               |  |     |    |                    |  |  |        |  |  |            |  |  |                           |  |  |          |  |  |          |  |  |          |  |  |
| 6.                         | What is your job title now (spell out - do not use acronyms)?                                                                                                    | 1. PHEM Officer<br>2. Others                                                                                                                                                                                                                                                                                                                                                                                                                                                                  |  |     |    |                    |  |  |        |  |  |            |  |  |                           |  |  |          |  |  |          |  |  |          |  |  |
| 7.                         | In what month and year (Ethiopian Calendar) did you begin the Job with the Title written above?                                                                  | _____ Month<br>_____ Year                                                                                                                                                                                                                                                                                                                                                                                                                                                                     |  |     |    |                    |  |  |        |  |  |            |  |  |                           |  |  |          |  |  |          |  |  |          |  |  |
| 8.                         | How many years of experience in health do you have?                                                                                                              | _____ Years                                                                                                                                                                                                                                                                                                                                                                                                                                                                                   |  |     |    |                    |  |  |        |  |  |            |  |  |                           |  |  |          |  |  |          |  |  |          |  |  |
| 9.                         | How long have you worked under your current supervisor (Woreda Health Office Head)?                                                                              | _____ Months<br>_____ Years                                                                                                                                                                                                                                                                                                                                                                                                                                                                   |  |     |    |                    |  |  |        |  |  |            |  |  |                           |  |  |          |  |  |          |  |  |          |  |  |
| 10.                        | Is there a computer or laptop in your office accessible for you?                                                                                                 | 1. Yes 2. No                                                                                                                                                                                                                                                                                                                                                                                                                                                                                  |  |     |    |                    |  |  |        |  |  |            |  |  |                           |  |  |          |  |  |          |  |  |          |  |  |
| 11.                        | Do you have your own computer/laptop?                                                                                                                            | 1. Yes 2. No                                                                                                                                                                                                                                                                                                                                                                                                                                                                                  |  |     |    |                    |  |  |        |  |  |            |  |  |                           |  |  |          |  |  |          |  |  |          |  |  |
| 12.                        | Is there mobile network in your Woreda?                                                                                                                          | 1. Yes 2. No                                                                                                                                                                                                                                                                                                                                                                                                                                                                                  |  |     |    |                    |  |  |        |  |  |            |  |  |                           |  |  |          |  |  |          |  |  |          |  |  |
| 13.                        | Do you have internet access at your office?                                                                                                                      | 1. Yes 2. No                                                                                                                                                                                                                                                                                                                                                                                                                                                                                  |  |     |    |                    |  |  |        |  |  |            |  |  |                           |  |  |          |  |  |          |  |  |          |  |  |
| 14.                        | Do you have your own internet access (e.g. mobile data)                                                                                                          | 1. Yes 2. No                                                                                                                                                                                                                                                                                                                                                                                                                                                                                  |  |     |    |                    |  |  |        |  |  |            |  |  |                           |  |  |          |  |  |          |  |  |          |  |  |
| 15.                        | How many days a week do you have electricity at your office (electric power or generator)?                                                                       | 1. Not at all<br>2. _____ Days                                                                                                                                                                                                                                                                                                                                                                                                                                                                |  |     |    |                    |  |  |        |  |  |            |  |  |                           |  |  |          |  |  |          |  |  |          |  |  |
| 16.                        | Did you attend trainings on surveillance, reporting, and/or outbreak investigations or any other training related to PHEM?<br><b>(Multiple Answers Possible)</b> | <table border="1"> <thead> <tr> <th></th> <th>Yes</th> <th>No</th> </tr> </thead> <tbody> <tr> <td>a. IDSR/PHEM Basic</td> <td></td> <td></td> </tr> <tr> <td>b. VPD</td> <td></td> <td></td> </tr> <tr> <td>c. Malaria</td> <td></td> <td></td> </tr> <tr> <td>d. Others (specify) _____</td> <td></td> <td></td> </tr> <tr> <td>e. _____</td> <td></td> <td></td> </tr> <tr> <td>f. _____</td> <td></td> <td></td> </tr> <tr> <td>g. _____</td> <td></td> <td></td> </tr> </tbody> </table> |  | Yes | No | a. IDSR/PHEM Basic |  |  | b. VPD |  |  | c. Malaria |  |  | d. Others (specify) _____ |  |  | e. _____ |  |  | f. _____ |  |  | g. _____ |  |  |
|                            | Yes                                                                                                                                                              | No                                                                                                                                                                                                                                                                                                                                                                                                                                                                                            |  |     |    |                    |  |  |        |  |  |            |  |  |                           |  |  |          |  |  |          |  |  |          |  |  |
| a. IDSR/PHEM Basic         |                                                                                                                                                                  |                                                                                                                                                                                                                                                                                                                                                                                                                                                                                               |  |     |    |                    |  |  |        |  |  |            |  |  |                           |  |  |          |  |  |          |  |  |          |  |  |
| b. VPD                     |                                                                                                                                                                  |                                                                                                                                                                                                                                                                                                                                                                                                                                                                                               |  |     |    |                    |  |  |        |  |  |            |  |  |                           |  |  |          |  |  |          |  |  |          |  |  |
| c. Malaria                 |                                                                                                                                                                  |                                                                                                                                                                                                                                                                                                                                                                                                                                                                                               |  |     |    |                    |  |  |        |  |  |            |  |  |                           |  |  |          |  |  |          |  |  |          |  |  |
| d. Others (specify) _____  |                                                                                                                                                                  |                                                                                                                                                                                                                                                                                                                                                                                                                                                                                               |  |     |    |                    |  |  |        |  |  |            |  |  |                           |  |  |          |  |  |          |  |  |          |  |  |
| e. _____                   |                                                                                                                                                                  |                                                                                                                                                                                                                                                                                                                                                                                                                                                                                               |  |     |    |                    |  |  |        |  |  |            |  |  |                           |  |  |          |  |  |          |  |  |          |  |  |
| f. _____                   |                                                                                                                                                                  |                                                                                                                                                                                                                                                                                                                                                                                                                                                                                               |  |     |    |                    |  |  |        |  |  |            |  |  |                           |  |  |          |  |  |          |  |  |          |  |  |
| g. _____                   |                                                                                                                                                                  |                                                                                                                                                                                                                                                                                                                                                                                                                                                                                               |  |     |    |                    |  |  |        |  |  |            |  |  |                           |  |  |          |  |  |          |  |  |          |  |  |
| 17.                        | Have you attended FETP-Frontline?                                                                                                                                | 1. Yes<br>2. No <b>(Skip to Q21)</b>                                                                                                                                                                                                                                                                                                                                                                                                                                                          |  |     |    |                    |  |  |        |  |  |            |  |  |                           |  |  |          |  |  |          |  |  |          |  |  |
| 18.                        | When you began FETP-Frontline training, what was your Job Title? (spell out – do not use acronyms)                                                               | 1. PHEM Officer<br>2. Other (Specify)                                                                                                                                                                                                                                                                                                                                                                                                                                                         |  |     |    |                    |  |  |        |  |  |            |  |  |                           |  |  |          |  |  |          |  |  |          |  |  |
| 19.                        | Is your current Job supervisor the same immediate Job Supervisor you had during Frontline training?                                                              | 1. Yes<br>2. No                                                                                                                                                                                                                                                                                                                                                                                                                                                                               |  |     |    |                    |  |  |        |  |  |            |  |  |                           |  |  |          |  |  |          |  |  |          |  |  |
| 20.                        | In what month and year (Ethiopian Calendar) did you complete or end the frontline training?                                                                      | _____ Month<br>_____ Year                                                                                                                                                                                                                                                                                                                                                                                                                                                                     |  |     |    |                    |  |  |        |  |  |            |  |  |                           |  |  |          |  |  |          |  |  |          |  |  |

*Evaluation for FETP-Frontline in Ethiopia*

|                                                      |                                                                                                                                                                                |                                                                                                                                            |                                                                          |                                                                 |                                                        |
|------------------------------------------------------|--------------------------------------------------------------------------------------------------------------------------------------------------------------------------------|--------------------------------------------------------------------------------------------------------------------------------------------|--------------------------------------------------------------------------|-----------------------------------------------------------------|--------------------------------------------------------|
| 21.                                                  | What is the total number of reporting sites in your woreda?                                                                                                                    |                                                                                                                                            |                                                                          |                                                                 |                                                        |
|                                                      |                                                                                                                                                                                | <b>Total Number</b>                                                                                                                        | <b>How many PHEM Focal Persons Received IDSR or PHEM Basic Training?</b> |                                                                 |                                                        |
|                                                      | a. Health Centers                                                                                                                                                              |                                                                                                                                            |                                                                          |                                                                 |                                                        |
|                                                      | b. Health Posts                                                                                                                                                                |                                                                                                                                            |                                                                          |                                                                 |                                                        |
|                                                      | c. Hospitals                                                                                                                                                                   |                                                                                                                                            |                                                                          |                                                                 |                                                        |
|                                                      | d. Private Health Facilities (Medium Clinic & Above)                                                                                                                           |                                                                                                                                            |                                                                          |                                                                 |                                                        |
|                                                      | e. NGO and Others                                                                                                                                                              |                                                                                                                                            |                                                                          |                                                                 |                                                        |
|                                                      | <b>Total</b>                                                                                                                                                                   |                                                                                                                                            |                                                                          |                                                                 |                                                        |
| 22.                                                  | For the last 6 months (26 weeks) what was timeliness and completeness of the Woreda?                                                                                           |                                                                                                                                            |                                                                          |                                                                 |                                                        |
|                                                      | _____ % Completeness                                                                                                                                                           |                                                                                                                                            |                                                                          |                                                                 |                                                        |
|                                                      | _____ % Timeliness                                                                                                                                                             |                                                                                                                                            |                                                                          |                                                                 |                                                        |
|                                                      |                                                                                                                                                                                | <b>Completeness</b>                                                                                                                        |                                                                          | <b>Timeliness</b>                                               |                                                        |
|                                                      |                                                                                                                                                                                | <b>Number of reports in the last 1 Months (Out of 4)</b>                                                                                   | <b>Number Submitted report in the last week</b>                          | <b>Number of timely reports in the last 1 Months (Out of 4)</b> | <b>Number Submitted timely report in the last week</b> |
|                                                      | a. Health Centers                                                                                                                                                              |                                                                                                                                            |                                                                          |                                                                 |                                                        |
|                                                      | b. Health Posts                                                                                                                                                                |                                                                                                                                            |                                                                          |                                                                 |                                                        |
| c. Hospitals                                         |                                                                                                                                                                                |                                                                                                                                            |                                                                          |                                                                 |                                                        |
| d. Private Health Facilities (Medium Clinic & Above) |                                                                                                                                                                                |                                                                                                                                            |                                                                          |                                                                 |                                                        |
| e. NGO and Others                                    |                                                                                                                                                                                |                                                                                                                                            |                                                                          |                                                                 |                                                        |
|                                                      | <b>Total</b>                                                                                                                                                                   |                                                                                                                                            |                                                                          |                                                                 |                                                        |
| 23.                                                  | Which of the following method(s) do you use to collect or receive surveillance data from health facilities or other reporting sites?<br><br><b>(Multiple Answers Possible)</b> |                                                                                                                                            | <b>Yes</b>                                                               | <b>No</b>                                                       |                                                        |
|                                                      |                                                                                                                                                                                | a. Paper reports                                                                                                                           |                                                                          |                                                                 |                                                        |
|                                                      |                                                                                                                                                                                | b. Telephone calls                                                                                                                         |                                                                          |                                                                 |                                                        |
|                                                      |                                                                                                                                                                                | c. SMS/text                                                                                                                                |                                                                          |                                                                 |                                                        |
|                                                      |                                                                                                                                                                                | d. E-mail                                                                                                                                  |                                                                          |                                                                 |                                                        |
|                                                      |                                                                                                                                                                                | e. Other, please list                                                                                                                      |                                                                          |                                                                 |                                                        |
| 24.                                                  | Do you develop <b>bulletin</b> (or surveillance summary report)?                                                                                                               | 1. Yes<br>2. No <b>(Skip to 30)</b>                                                                                                        |                                                                          |                                                                 |                                                        |
| 25.                                                  | How <b>often</b> do you develop weekly bulletin (surveillance summary report)?                                                                                                 | 1. Weekly<br>2. Monthly<br>3. Every three months<br>4. Every six month<br>5. Annually<br>6. I do not develop bulletin/surveillance reports |                                                                          |                                                                 |                                                        |
| 26.                                                  | Have you shared the bulletin to the stakeholders?                                                                                                                              | 1. Yes<br>2. No <b>(Skip to 30)</b>                                                                                                        |                                                                          |                                                                 |                                                        |
| 27.                                                  | If shared, what are the stakeholders that got the bulletin?<br><b>(Multiple Answers Possible; Do not read responses)</b>                                                       | 1. Health Centers<br>2. Woreda Health Office<br>3. Other health facilities<br>4. Others _____                                              |                                                                          |                                                                 |                                                        |

*Evaluation for FETP-Frontline in Ethiopia*

| 28.            | Is there any action taken or recommendations made as a result of the bulletin or summary report?                                                           | 1. Yes<br>2. No <b>(Skip to 30)</b>                                                                                                                                                                                                                                                                                                                                                                                                                                                 |  |             |            |  |        |  |        |  |           |  |                |  |            |  |           |  |           |  |              |  |
|----------------|------------------------------------------------------------------------------------------------------------------------------------------------------------|-------------------------------------------------------------------------------------------------------------------------------------------------------------------------------------------------------------------------------------------------------------------------------------------------------------------------------------------------------------------------------------------------------------------------------------------------------------------------------------|--|-------------|------------|--|--------|--|--------|--|-----------|--|----------------|--|------------|--|-----------|--|-----------|--|--------------|--|
| 29.            | If yes, please describe it.                                                                                                                                | _____<br>_____<br>_____                                                                                                                                                                                                                                                                                                                                                                                                                                                             |  |             |            |  |        |  |        |  |           |  |                |  |            |  |           |  |           |  |              |  |
| 30.            | Have you received data or detected any immediately reportable diseases in the last six months?                                                             | 1. Yes<br>2. No                                                                                                                                                                                                                                                                                                                                                                                                                                                                     |  |             |            |  |        |  |        |  |           |  |                |  |            |  |           |  |           |  |              |  |
| 31.            | How many cases of Immediately notifiable diseases (events) have you reported in the <b>last six months?</b>                                                | <table border="1"> <thead> <tr> <th></th> <th>No of Cases</th> </tr> </thead> <tbody> <tr> <td>a. Measles</td> <td></td> </tr> <tr> <td>b. AFP</td> <td></td> </tr> <tr> <td>c. NNT</td> <td></td> </tr> <tr> <td>d. Rabies</td> <td></td> </tr> <tr> <td>e. Cholera/AWD</td> <td></td> </tr> <tr> <td>f. Anthrax</td> <td></td> </tr> <tr> <td>g. Others</td> <td></td> </tr> <tr> <td>h. Others</td> <td></td> </tr> <tr> <td><b>Total</b></td> <td></td> </tr> </tbody> </table> |  | No of Cases | a. Measles |  | b. AFP |  | c. NNT |  | d. Rabies |  | e. Cholera/AWD |  | f. Anthrax |  | g. Others |  | h. Others |  | <b>Total</b> |  |
|                | No of Cases                                                                                                                                                |                                                                                                                                                                                                                                                                                                                                                                                                                                                                                     |  |             |            |  |        |  |        |  |           |  |                |  |            |  |           |  |           |  |              |  |
| a. Measles     |                                                                                                                                                            |                                                                                                                                                                                                                                                                                                                                                                                                                                                                                     |  |             |            |  |        |  |        |  |           |  |                |  |            |  |           |  |           |  |              |  |
| b. AFP         |                                                                                                                                                            |                                                                                                                                                                                                                                                                                                                                                                                                                                                                                     |  |             |            |  |        |  |        |  |           |  |                |  |            |  |           |  |           |  |              |  |
| c. NNT         |                                                                                                                                                            |                                                                                                                                                                                                                                                                                                                                                                                                                                                                                     |  |             |            |  |        |  |        |  |           |  |                |  |            |  |           |  |           |  |              |  |
| d. Rabies      |                                                                                                                                                            |                                                                                                                                                                                                                                                                                                                                                                                                                                                                                     |  |             |            |  |        |  |        |  |           |  |                |  |            |  |           |  |           |  |              |  |
| e. Cholera/AWD |                                                                                                                                                            |                                                                                                                                                                                                                                                                                                                                                                                                                                                                                     |  |             |            |  |        |  |        |  |           |  |                |  |            |  |           |  |           |  |              |  |
| f. Anthrax     |                                                                                                                                                            |                                                                                                                                                                                                                                                                                                                                                                                                                                                                                     |  |             |            |  |        |  |        |  |           |  |                |  |            |  |           |  |           |  |              |  |
| g. Others      |                                                                                                                                                            |                                                                                                                                                                                                                                                                                                                                                                                                                                                                                     |  |             |            |  |        |  |        |  |           |  |                |  |            |  |           |  |           |  |              |  |
| h. Others      |                                                                                                                                                            |                                                                                                                                                                                                                                                                                                                                                                                                                                                                                     |  |             |            |  |        |  |        |  |           |  |                |  |            |  |           |  |           |  |              |  |
| <b>Total</b>   |                                                                                                                                                            |                                                                                                                                                                                                                                                                                                                                                                                                                                                                                     |  |             |            |  |        |  |        |  |           |  |                |  |            |  |           |  |           |  |              |  |
| 32.            | Have you investigated any of the immediately reportable diseases?                                                                                          | 1. Yes<br>2. No                                                                                                                                                                                                                                                                                                                                                                                                                                                                     |  |             |            |  |        |  |        |  |           |  |                |  |            |  |           |  |           |  |              |  |
| 33.            | How many of the total immediately reportable diseases have you investigated?                                                                               | _____ Number of Cases                                                                                                                                                                                                                                                                                                                                                                                                                                                               |  |             |            |  |        |  |        |  |           |  |                |  |            |  |           |  |           |  |              |  |
| 34.            | For how many of the total immediately reportable diseases have you filled <b>case based reporting form?</b>                                                | _____ Number of Cases                                                                                                                                                                                                                                                                                                                                                                                                                                                               |  |             |            |  |        |  |        |  |           |  |                |  |            |  |           |  |           |  |              |  |
| 35.            | What activities have you conducted in the case investigations you did?<br><b>(Multiple Answers Possible; Do not read responses)</b>                        | 1. Patient assessment<br>2. Case based form filling<br>3. Lab sample taken/transported<br>4. Feedback given<br>5. others specify _____                                                                                                                                                                                                                                                                                                                                              |  |             |            |  |        |  |        |  |           |  |                |  |            |  |           |  |           |  |              |  |
| 36.            | Have you visited reporting sites (health centers, etc) to check for data consistency/missing or to conduct data quality audit in <b>the last 6 months?</b> | 1. Yes<br>2. No <b>(If no, skip to Q39)</b>                                                                                                                                                                                                                                                                                                                                                                                                                                         |  |             |            |  |        |  |        |  |           |  |                |  |            |  |           |  |           |  |              |  |
| 37.            | Is there any action taken or recommendations made as a result of the data consistency check or quality audit?                                              | 1. Yes<br>2. No <b>(If no, skip to Q39)</b>                                                                                                                                                                                                                                                                                                                                                                                                                                         |  |             |            |  |        |  |        |  |           |  |                |  |            |  |           |  |           |  |              |  |
| 38.            | If yes, please describe it.                                                                                                                                | _____<br>_____<br>_____                                                                                                                                                                                                                                                                                                                                                                                                                                                             |  |             |            |  |        |  |        |  |           |  |                |  |            |  |           |  |           |  |              |  |
| 39.            | Have you conducted active surveillance/ active case search at health facility or at community?                                                             | 1. Yes<br>2. No <b>(If no, skip to Q44)</b>                                                                                                                                                                                                                                                                                                                                                                                                                                         |  |             |            |  |        |  |        |  |           |  |                |  |            |  |           |  |           |  |              |  |
| 40.            | How many supportive supervision visit have you conducted in the last six months? And How many health facilities did you visit?                             | _____ Number of times<br>_____ Number of health facilities visited                                                                                                                                                                                                                                                                                                                                                                                                                  |  |             |            |  |        |  |        |  |           |  |                |  |            |  |           |  |           |  |              |  |

*Evaluation for FETP-Frontline in Ethiopia*

|     |                                                                                                                                 |                                                                                                                                                                                                                |
|-----|---------------------------------------------------------------------------------------------------------------------------------|----------------------------------------------------------------------------------------------------------------------------------------------------------------------------------------------------------------|
| 41. | Have provided feedback to the health facilities?                                                                                | 1. On-site feedback<br>2. Written feedback<br>3. No feedback given                                                                                                                                             |
| 42. | Is there any action taken or recommendations made as a result of the supportive supervision?                                    | 1. Yes<br>2. No <b>(If no, skip to Q44)</b>                                                                                                                                                                    |
| 43. | If yes, please describe it.                                                                                                     | _____<br>_____<br>_____                                                                                                                                                                                        |
| 44. | Have you conducted SWOT analysis?                                                                                               | 1. Yes<br>2. No <b>(If no, skip to Q47)</b>                                                                                                                                                                    |
| 45. | Is there any action taken or recommendations made as a result of the SWOT analysis?                                             | 1. Yes<br>2. No <b>(If no, skip to Q47)</b>                                                                                                                                                                    |
| 46. | If yes, please describe it.                                                                                                     | _____<br>_____<br>_____                                                                                                                                                                                        |
| 47. | Have you provided any formal/informal training to PHEM focal persons?                                                           | 1. Yes<br>2. No <b>(If no, skip to Q49)</b>                                                                                                                                                                    |
| 48. | How many sessions of the training have you provided in the <b>last six months</b> ?                                             | _____ Number of format trainings<br>_____ Number of informal trainings                                                                                                                                         |
| 49. | Was there any outbreak/suspected outbreak in the Woreda in the last six months?                                                 | 1. Yes<br>2. No <b>(If no, skip to Q57)</b>                                                                                                                                                                    |
| 50. | How many of the outbreaks are detected by each of the responsible bodies?<br><br><b>Multiple Response Possible</b>              | 1. _____ reported from health facilities<br>2. _____ detected by the Woreda PHEM officer<br>3. _____ reported by the community<br>4. _____ other (specify) _____<br>_____                                      |
| 51. | How many outbreak/suspected outbreak was reported in the Woreda in the <b>last six months</b> ?                                 | _____ Number of outbreaks<br>_____ Number of suspected outbreaks                                                                                                                                               |
| 52. | How many of the total outbreak/suspected outbreak was <b>investigated</b> ?                                                     | _____ Number of outbreaks/suspected outbreaks                                                                                                                                                                  |
| 53. | For how many of the total outbreak/suspected outbreak did you prepare <b>linelist</b> ?                                         | _____ Number of outbreaks/suspected outbreaks                                                                                                                                                                  |
| 54. | Have you developed outbreak report for the most recent outbreak?                                                                | 1. Yes<br>2. No                                                                                                                                                                                                |
| 55. | Have produced line graph for the most recent outbreak?                                                                          | 1. Yes<br>2. No                                                                                                                                                                                                |
| 56. | What was your role in the outbreak investigation and response?<br><br><b>(Multiple Answers Possible; Do not read responses)</b> | 1. Leading the investigation and response<br>2. Data compilation<br>3. Active case search<br>4. Developing line list<br>5. Data analysis<br>6. Preparing and sending report<br>7. Other specify _____<br>_____ |

*Evaluation for FETP-Frontline in Ethiopia*

|     |                                                                                                                                                                                                                                                                             |                                                                                                                                                                                                                                |   |  |   |  |   |  |   |  |   |  |   |  |
|-----|-----------------------------------------------------------------------------------------------------------------------------------------------------------------------------------------------------------------------------------------------------------------------------|--------------------------------------------------------------------------------------------------------------------------------------------------------------------------------------------------------------------------------|---|--|---|--|---|--|---|--|---|--|---|--|
| 57. | Have you ever used MS office (Word, Excel, PPT) and other computer program?                                                                                                                                                                                                 | 1. Yes<br>2. No                                                                                                                                                                                                                |   |  |   |  |   |  |   |  |   |  |   |  |
| 58. | Which computer program have you used to analyze/report/present surveillance data?<br><br><b>(Multiple Answers Possible; Do not read responses)</b>                                                                                                                          | 1. MS Word<br>2. MS Excel<br>3. MS PowerPoint<br>4. Internet Explorer<br>5. Other Specify _____                                                                                                                                |   |  |   |  |   |  |   |  |   |  |   |  |
| 59. | Have you prepared surveillance data table using MS excel?                                                                                                                                                                                                                   | 1. Yes<br>2. No                                                                                                                                                                                                                |   |  |   |  |   |  |   |  |   |  |   |  |
| 60. | Can you use <b>email</b> to communicate through internet?                                                                                                                                                                                                                   | 1. Yes<br>2. No                                                                                                                                                                                                                |   |  |   |  |   |  |   |  |   |  |   |  |
| 61. | In the last one month, have you communicated through e-mail?                                                                                                                                                                                                                | 1. Yes<br>2. No                                                                                                                                                                                                                |   |  |   |  |   |  |   |  |   |  |   |  |
| 62. | What challenges do you face in receiving surveillance data that is timely, complete, and accurate?<br><i>(Probe: issues related to network connectivity, lack of access to a computer, reliable electricity power, challenges related to inadequate training for staff)</i> | <table border="1" style="width: 100%;"> <tr><td>1</td><td></td></tr> <tr><td>2</td><td></td></tr> <tr><td>3</td><td></td></tr> <tr><td>4</td><td></td></tr> <tr><td>5</td><td></td></tr> <tr><td>6</td><td></td></tr> </table> | 1 |  | 2 |  | 3 |  | 4 |  | 5 |  | 6 |  |
| 1   |                                                                                                                                                                                                                                                                             |                                                                                                                                                                                                                                |   |  |   |  |   |  |   |  |   |  |   |  |
| 2   |                                                                                                                                                                                                                                                                             |                                                                                                                                                                                                                                |   |  |   |  |   |  |   |  |   |  |   |  |
| 3   |                                                                                                                                                                                                                                                                             |                                                                                                                                                                                                                                |   |  |   |  |   |  |   |  |   |  |   |  |
| 4   |                                                                                                                                                                                                                                                                             |                                                                                                                                                                                                                                |   |  |   |  |   |  |   |  |   |  |   |  |
| 5   |                                                                                                                                                                                                                                                                             |                                                                                                                                                                                                                                |   |  |   |  |   |  |   |  |   |  |   |  |
| 6   |                                                                                                                                                                                                                                                                             |                                                                                                                                                                                                                                |   |  |   |  |   |  |   |  |   |  |   |  |

**FETP-PARTICIPANT ONLY**

|                                                                   |                                                                                                                                                                                                                                                                                                                                                                                                                                                                 |                         |          |          |          |          |
|-------------------------------------------------------------------|-----------------------------------------------------------------------------------------------------------------------------------------------------------------------------------------------------------------------------------------------------------------------------------------------------------------------------------------------------------------------------------------------------------------------------------------------------------------|-------------------------|----------|----------|----------|----------|
| 63.                                                               | Think about the time <b>before you began FETP-Frontline training</b> and rate your skill level in performing the following activities according to the scale provided.                                                                                                                                                                                                                                                                                          |                         |          |          |          |          |
|                                                                   | <p><b>1. No Skills at all</b> (Can't perform the activity, no experience)</p> <p><b>2. Limited Skills</b> (Perform the activity with major error, few experience)</p> <p><b>3. Satisfactory Skills</b> (Perform the activity with some insignificant errors, adequate experience)</p> <p><b>4. Advanced skills</b> (Perform the activity with almost no error, good experience)</p> <p><b>5. Expert Skills</b> (Perform the activity, excellent experience)</p> |                         |          |          |          |          |
|                                                                   |                                                                                                                                                                                                                                                                                                                                                                                                                                                                 | <b>Response Options</b> |          |          |          |          |
|                                                                   |                                                                                                                                                                                                                                                                                                                                                                                                                                                                 | <b>1</b>                | <b>2</b> | <b>3</b> | <b>4</b> | <b>5</b> |
|                                                                   | 1. Collecting or receiving data on reportable diseases?                                                                                                                                                                                                                                                                                                                                                                                                         |                         |          |          |          |          |
|                                                                   | 2. Reviewing surveillance data for accuracy and consistency?                                                                                                                                                                                                                                                                                                                                                                                                    |                         |          |          |          |          |
|                                                                   | 3. Conducting active surveillance/active case search?                                                                                                                                                                                                                                                                                                                                                                                                           |                         |          |          |          |          |
|                                                                   | 4. Conducting a surveillance data quality audit?                                                                                                                                                                                                                                                                                                                                                                                                                |                         |          |          |          |          |
|                                                                   | 5. Using surveillance data to make line lists?                                                                                                                                                                                                                                                                                                                                                                                                                  |                         |          |          |          |          |
|                                                                   | 6. Using surveillance data to make charts/graphs?                                                                                                                                                                                                                                                                                                                                                                                                               |                         |          |          |          |          |
|                                                                   | 7. Using surveillance data to make tables?                                                                                                                                                                                                                                                                                                                                                                                                                      |                         |          |          |          |          |
|                                                                   | 8. Developing weekly bulletin/surveillance summary report?                                                                                                                                                                                                                                                                                                                                                                                                      |                         |          |          |          |          |
|                                                                   | 9. Calculating disease frequency with prevalence or incidence?                                                                                                                                                                                                                                                                                                                                                                                                  |                         |          |          |          |          |
|                                                                   | 10. Summarizing line list data by mean, median and mode?                                                                                                                                                                                                                                                                                                                                                                                                        |                         |          |          |          |          |
|                                                                   | 11. Calculating measures of association with relative risk or odds ratio?                                                                                                                                                                                                                                                                                                                                                                                       |                         |          |          |          |          |
|                                                                   | 12. Conducting problem analysis to identify root cause of a problem?                                                                                                                                                                                                                                                                                                                                                                                            |                         |          |          |          |          |
|                                                                   | 13. Using surveillance data to make recommendation or to take action?                                                                                                                                                                                                                                                                                                                                                                                           |                         |          |          |          |          |
|                                                                   | 14. Conducting outbreak investigations?                                                                                                                                                                                                                                                                                                                                                                                                                         |                         |          |          |          |          |
|                                                                   | 15. Making supportive supervisory visits to any reporting sites?                                                                                                                                                                                                                                                                                                                                                                                                |                         |          |          |          |          |
|                                                                   | 16. Preparing scientific report?                                                                                                                                                                                                                                                                                                                                                                                                                                |                         |          |          |          |          |
| 17. Conducting immediately reportable disease case investigation? |                                                                                                                                                                                                                                                                                                                                                                                                                                                                 |                         |          |          |          |          |
| 18. Preparing surveillance data table using MS excel?             |                                                                                                                                                                                                                                                                                                                                                                                                                                                                 |                         |          |          |          |          |
| 19. Preparing graph using MS excel?                               |                                                                                                                                                                                                                                                                                                                                                                                                                                                                 |                         |          |          |          |          |

*Evaluation for FETP-Frontline in Ethiopia*

|                                                                           | <table border="1" style="width:100%; border-collapse: collapse;"> <tr><td>20. Communicating through e-mail?</td><td></td><td></td><td></td><td></td><td></td></tr> <tr><td>21. Preparing surveillance report using MS PPT?</td><td></td><td></td><td></td><td></td><td></td></tr> <tr><td>22. Presenting report to scientific community?</td><td></td><td></td><td></td><td></td><td></td></tr> <tr><td>23. Calculating completeness of surveillance report?</td><td></td><td></td><td></td><td></td><td></td></tr> <tr><td>24. Calculating timeliness of surveillance report?</td><td></td><td></td><td></td><td></td><td></td></tr> <tr><td>25. Conducting informal or formal training on surveillance/PHEM?</td><td></td><td></td><td></td><td></td><td></td></tr> </table>                                                                                                                                                                                                                                                                                                                                                                                                                                                                                                                                                                                                                                                                                                                                                                                                                                                                                                                                                                                                                                                                                                                                                                                                                                                                                                                                                                                                                                                                                                                                                                                                                                                                                                                                                                                                                                                                                                                                                                                                                                                                                                                                                                                                                                                                                                                                                                                                                                                                                                                                                                                                                                                                                                                                                                                                                                                                                                                                                                                                                                                                                                                                                   | 20. Communicating through e-mail?                                                                     |                  |   |   |  |  | 21. Preparing surveillance report using MS PPT? |   |   |   |   |                                                         | 22. Presenting report to scientific community? |  |  |  |  |                                                              | 23. Calculating completeness of surveillance report? |  |  |  |  |                                                       | 24. Calculating timeliness of surveillance report? |  |  |  |  |                                                  | 25. Conducting informal or formal training on surveillance/PHEM? |  |  |  |  |                                                |  |  |  |  |  |                                                   |  |  |  |  |  |                                            |  |  |  |  |  |                                                            |  |  |  |  |  |                                                                |  |  |  |  |  |                                                          |  |  |  |  |  |                                                                           |  |  |  |  |  |                                                                      |  |  |  |  |  |                                                                       |  |  |  |  |  |                                         |  |  |  |  |  |                                                                  |  |  |  |  |  |                                  |  |  |  |  |  |                                                                   |  |  |  |  |  |                                                       |  |  |  |  |  |                                     |  |  |  |  |  |                                   |  |  |  |  |  |                                                 |  |  |  |  |  |                                                |  |  |  |  |  |                                                      |  |  |  |  |  |                                                    |  |  |  |  |  |                                                                  |  |  |  |  |  |  |  |  |  |
|---------------------------------------------------------------------------|----------------------------------------------------------------------------------------------------------------------------------------------------------------------------------------------------------------------------------------------------------------------------------------------------------------------------------------------------------------------------------------------------------------------------------------------------------------------------------------------------------------------------------------------------------------------------------------------------------------------------------------------------------------------------------------------------------------------------------------------------------------------------------------------------------------------------------------------------------------------------------------------------------------------------------------------------------------------------------------------------------------------------------------------------------------------------------------------------------------------------------------------------------------------------------------------------------------------------------------------------------------------------------------------------------------------------------------------------------------------------------------------------------------------------------------------------------------------------------------------------------------------------------------------------------------------------------------------------------------------------------------------------------------------------------------------------------------------------------------------------------------------------------------------------------------------------------------------------------------------------------------------------------------------------------------------------------------------------------------------------------------------------------------------------------------------------------------------------------------------------------------------------------------------------------------------------------------------------------------------------------------------------------------------------------------------------------------------------------------------------------------------------------------------------------------------------------------------------------------------------------------------------------------------------------------------------------------------------------------------------------------------------------------------------------------------------------------------------------------------------------------------------------------------------------------------------------------------------------------------------------------------------------------------------------------------------------------------------------------------------------------------------------------------------------------------------------------------------------------------------------------------------------------------------------------------------------------------------------------------------------------------------------------------------------------------------------------------------------------------------------------------------------------------------------------------------------------------------------------------------------------------------------------------------------------------------------------------------------------------------------------------------------------------------------------------------------------------------------------------------------------------------------------------------------------------------------------------------------------------------------------------------------------------------------|-------------------------------------------------------------------------------------------------------|------------------|---|---|--|--|-------------------------------------------------|---|---|---|---|---------------------------------------------------------|------------------------------------------------|--|--|--|--|--------------------------------------------------------------|------------------------------------------------------|--|--|--|--|-------------------------------------------------------|----------------------------------------------------|--|--|--|--|--------------------------------------------------|------------------------------------------------------------------|--|--|--|--|------------------------------------------------|--|--|--|--|--|---------------------------------------------------|--|--|--|--|--|--------------------------------------------|--|--|--|--|--|------------------------------------------------------------|--|--|--|--|--|----------------------------------------------------------------|--|--|--|--|--|----------------------------------------------------------|--|--|--|--|--|---------------------------------------------------------------------------|--|--|--|--|--|----------------------------------------------------------------------|--|--|--|--|--|-----------------------------------------------------------------------|--|--|--|--|--|-----------------------------------------|--|--|--|--|--|------------------------------------------------------------------|--|--|--|--|--|----------------------------------|--|--|--|--|--|-------------------------------------------------------------------|--|--|--|--|--|-------------------------------------------------------|--|--|--|--|--|-------------------------------------|--|--|--|--|--|-----------------------------------|--|--|--|--|--|-------------------------------------------------|--|--|--|--|--|------------------------------------------------|--|--|--|--|--|------------------------------------------------------|--|--|--|--|--|----------------------------------------------------|--|--|--|--|--|------------------------------------------------------------------|--|--|--|--|--|--|--|--|--|
| 20. Communicating through e-mail?                                         |                                                                                                                                                                                                                                                                                                                                                                                                                                                                                                                                                                                                                                                                                                                                                                                                                                                                                                                                                                                                                                                                                                                                                                                                                                                                                                                                                                                                                                                                                                                                                                                                                                                                                                                                                                                                                                                                                                                                                                                                                                                                                                                                                                                                                                                                                                                                                                                                                                                                                                                                                                                                                                                                                                                                                                                                                                                                                                                                                                                                                                                                                                                                                                                                                                                                                                                                                                                                                                                                                                                                                                                                                                                                                                                                                                                                                                                                                                                                  |                                                                                                       |                  |   |   |  |  |                                                 |   |   |   |   |                                                         |                                                |  |  |  |  |                                                              |                                                      |  |  |  |  |                                                       |                                                    |  |  |  |  |                                                  |                                                                  |  |  |  |  |                                                |  |  |  |  |  |                                                   |  |  |  |  |  |                                            |  |  |  |  |  |                                                            |  |  |  |  |  |                                                                |  |  |  |  |  |                                                          |  |  |  |  |  |                                                                           |  |  |  |  |  |                                                                      |  |  |  |  |  |                                                                       |  |  |  |  |  |                                         |  |  |  |  |  |                                                                  |  |  |  |  |  |                                  |  |  |  |  |  |                                                                   |  |  |  |  |  |                                                       |  |  |  |  |  |                                     |  |  |  |  |  |                                   |  |  |  |  |  |                                                 |  |  |  |  |  |                                                |  |  |  |  |  |                                                      |  |  |  |  |  |                                                    |  |  |  |  |  |                                                                  |  |  |  |  |  |  |  |  |  |
| 21. Preparing surveillance report using MS PPT?                           |                                                                                                                                                                                                                                                                                                                                                                                                                                                                                                                                                                                                                                                                                                                                                                                                                                                                                                                                                                                                                                                                                                                                                                                                                                                                                                                                                                                                                                                                                                                                                                                                                                                                                                                                                                                                                                                                                                                                                                                                                                                                                                                                                                                                                                                                                                                                                                                                                                                                                                                                                                                                                                                                                                                                                                                                                                                                                                                                                                                                                                                                                                                                                                                                                                                                                                                                                                                                                                                                                                                                                                                                                                                                                                                                                                                                                                                                                                                                  |                                                                                                       |                  |   |   |  |  |                                                 |   |   |   |   |                                                         |                                                |  |  |  |  |                                                              |                                                      |  |  |  |  |                                                       |                                                    |  |  |  |  |                                                  |                                                                  |  |  |  |  |                                                |  |  |  |  |  |                                                   |  |  |  |  |  |                                            |  |  |  |  |  |                                                            |  |  |  |  |  |                                                                |  |  |  |  |  |                                                          |  |  |  |  |  |                                                                           |  |  |  |  |  |                                                                      |  |  |  |  |  |                                                                       |  |  |  |  |  |                                         |  |  |  |  |  |                                                                  |  |  |  |  |  |                                  |  |  |  |  |  |                                                                   |  |  |  |  |  |                                                       |  |  |  |  |  |                                     |  |  |  |  |  |                                   |  |  |  |  |  |                                                 |  |  |  |  |  |                                                |  |  |  |  |  |                                                      |  |  |  |  |  |                                                    |  |  |  |  |  |                                                                  |  |  |  |  |  |  |  |  |  |
| 22. Presenting report to scientific community?                            |                                                                                                                                                                                                                                                                                                                                                                                                                                                                                                                                                                                                                                                                                                                                                                                                                                                                                                                                                                                                                                                                                                                                                                                                                                                                                                                                                                                                                                                                                                                                                                                                                                                                                                                                                                                                                                                                                                                                                                                                                                                                                                                                                                                                                                                                                                                                                                                                                                                                                                                                                                                                                                                                                                                                                                                                                                                                                                                                                                                                                                                                                                                                                                                                                                                                                                                                                                                                                                                                                                                                                                                                                                                                                                                                                                                                                                                                                                                                  |                                                                                                       |                  |   |   |  |  |                                                 |   |   |   |   |                                                         |                                                |  |  |  |  |                                                              |                                                      |  |  |  |  |                                                       |                                                    |  |  |  |  |                                                  |                                                                  |  |  |  |  |                                                |  |  |  |  |  |                                                   |  |  |  |  |  |                                            |  |  |  |  |  |                                                            |  |  |  |  |  |                                                                |  |  |  |  |  |                                                          |  |  |  |  |  |                                                                           |  |  |  |  |  |                                                                      |  |  |  |  |  |                                                                       |  |  |  |  |  |                                         |  |  |  |  |  |                                                                  |  |  |  |  |  |                                  |  |  |  |  |  |                                                                   |  |  |  |  |  |                                                       |  |  |  |  |  |                                     |  |  |  |  |  |                                   |  |  |  |  |  |                                                 |  |  |  |  |  |                                                |  |  |  |  |  |                                                      |  |  |  |  |  |                                                    |  |  |  |  |  |                                                                  |  |  |  |  |  |  |  |  |  |
| 23. Calculating completeness of surveillance report?                      |                                                                                                                                                                                                                                                                                                                                                                                                                                                                                                                                                                                                                                                                                                                                                                                                                                                                                                                                                                                                                                                                                                                                                                                                                                                                                                                                                                                                                                                                                                                                                                                                                                                                                                                                                                                                                                                                                                                                                                                                                                                                                                                                                                                                                                                                                                                                                                                                                                                                                                                                                                                                                                                                                                                                                                                                                                                                                                                                                                                                                                                                                                                                                                                                                                                                                                                                                                                                                                                                                                                                                                                                                                                                                                                                                                                                                                                                                                                                  |                                                                                                       |                  |   |   |  |  |                                                 |   |   |   |   |                                                         |                                                |  |  |  |  |                                                              |                                                      |  |  |  |  |                                                       |                                                    |  |  |  |  |                                                  |                                                                  |  |  |  |  |                                                |  |  |  |  |  |                                                   |  |  |  |  |  |                                            |  |  |  |  |  |                                                            |  |  |  |  |  |                                                                |  |  |  |  |  |                                                          |  |  |  |  |  |                                                                           |  |  |  |  |  |                                                                      |  |  |  |  |  |                                                                       |  |  |  |  |  |                                         |  |  |  |  |  |                                                                  |  |  |  |  |  |                                  |  |  |  |  |  |                                                                   |  |  |  |  |  |                                                       |  |  |  |  |  |                                     |  |  |  |  |  |                                   |  |  |  |  |  |                                                 |  |  |  |  |  |                                                |  |  |  |  |  |                                                      |  |  |  |  |  |                                                    |  |  |  |  |  |                                                                  |  |  |  |  |  |  |  |  |  |
| 24. Calculating timeliness of surveillance report?                        |                                                                                                                                                                                                                                                                                                                                                                                                                                                                                                                                                                                                                                                                                                                                                                                                                                                                                                                                                                                                                                                                                                                                                                                                                                                                                                                                                                                                                                                                                                                                                                                                                                                                                                                                                                                                                                                                                                                                                                                                                                                                                                                                                                                                                                                                                                                                                                                                                                                                                                                                                                                                                                                                                                                                                                                                                                                                                                                                                                                                                                                                                                                                                                                                                                                                                                                                                                                                                                                                                                                                                                                                                                                                                                                                                                                                                                                                                                                                  |                                                                                                       |                  |   |   |  |  |                                                 |   |   |   |   |                                                         |                                                |  |  |  |  |                                                              |                                                      |  |  |  |  |                                                       |                                                    |  |  |  |  |                                                  |                                                                  |  |  |  |  |                                                |  |  |  |  |  |                                                   |  |  |  |  |  |                                            |  |  |  |  |  |                                                            |  |  |  |  |  |                                                                |  |  |  |  |  |                                                          |  |  |  |  |  |                                                                           |  |  |  |  |  |                                                                      |  |  |  |  |  |                                                                       |  |  |  |  |  |                                         |  |  |  |  |  |                                                                  |  |  |  |  |  |                                  |  |  |  |  |  |                                                                   |  |  |  |  |  |                                                       |  |  |  |  |  |                                     |  |  |  |  |  |                                   |  |  |  |  |  |                                                 |  |  |  |  |  |                                                |  |  |  |  |  |                                                      |  |  |  |  |  |                                                    |  |  |  |  |  |                                                                  |  |  |  |  |  |  |  |  |  |
| 25. Conducting informal or formal training on surveillance/PHEM?          |                                                                                                                                                                                                                                                                                                                                                                                                                                                                                                                                                                                                                                                                                                                                                                                                                                                                                                                                                                                                                                                                                                                                                                                                                                                                                                                                                                                                                                                                                                                                                                                                                                                                                                                                                                                                                                                                                                                                                                                                                                                                                                                                                                                                                                                                                                                                                                                                                                                                                                                                                                                                                                                                                                                                                                                                                                                                                                                                                                                                                                                                                                                                                                                                                                                                                                                                                                                                                                                                                                                                                                                                                                                                                                                                                                                                                                                                                                                                  |                                                                                                       |                  |   |   |  |  |                                                 |   |   |   |   |                                                         |                                                |  |  |  |  |                                                              |                                                      |  |  |  |  |                                                       |                                                    |  |  |  |  |                                                  |                                                                  |  |  |  |  |                                                |  |  |  |  |  |                                                   |  |  |  |  |  |                                            |  |  |  |  |  |                                                            |  |  |  |  |  |                                                                |  |  |  |  |  |                                                          |  |  |  |  |  |                                                                           |  |  |  |  |  |                                                                      |  |  |  |  |  |                                                                       |  |  |  |  |  |                                         |  |  |  |  |  |                                                                  |  |  |  |  |  |                                  |  |  |  |  |  |                                                                   |  |  |  |  |  |                                                       |  |  |  |  |  |                                     |  |  |  |  |  |                                   |  |  |  |  |  |                                                 |  |  |  |  |  |                                                |  |  |  |  |  |                                                      |  |  |  |  |  |                                                    |  |  |  |  |  |                                                                  |  |  |  |  |  |  |  |  |  |
| 64.                                                                       | <p>Think about the time <b>since you completed Frontline training</b> and rate your skill level in performing the following activities according to the scale provided.</p> <p><b>1. No Skills at all</b> (Can't perform the activity, no experience)<br/> <b>2. Limited Skills</b> (Perform the activity with major error, few experience)<br/> <b>3. Satisfactory Skills</b> (Perform the activity with some insignificant errors, adequate experience)<br/> <b>4. Advanced skills</b> (Perform the activity with almost no error, good experience)<br/> <b>5. Expert Skills</b> (Perform the activity, excellent experience)</p> <table border="1" style="width:100%; border-collapse: collapse;"> <thead> <tr> <th rowspan="2"></th> <th colspan="5">Response Options</th> </tr> <tr> <th>1</th> <th>2</th> <th>3</th> <th>4</th> <th>5</th> </tr> </thead> <tbody> <tr><td>1. Collecting or receiving data on reportable diseases?</td><td></td><td></td><td></td><td></td><td></td></tr> <tr><td>2. Reviewing surveillance data for accuracy and consistency?</td><td></td><td></td><td></td><td></td><td></td></tr> <tr><td>3. Conducting active surveillance/active case search?</td><td></td><td></td><td></td><td></td><td></td></tr> <tr><td>4. Conducting a surveillance data quality audit?</td><td></td><td></td><td></td><td></td><td></td></tr> <tr><td>5. Using surveillance data to make line lists?</td><td></td><td></td><td></td><td></td><td></td></tr> <tr><td>6. Using surveillance data to make charts/graphs?</td><td></td><td></td><td></td><td></td><td></td></tr> <tr><td>7. Using surveillance data to make tables?</td><td></td><td></td><td></td><td></td><td></td></tr> <tr><td>8. Developing weekly bulletin/surveillance summary report?</td><td></td><td></td><td></td><td></td><td></td></tr> <tr><td>9. Calculating disease frequency with prevalence or incidence?</td><td></td><td></td><td></td><td></td><td></td></tr> <tr><td>10. Summarizing line list data by mean, median and mode?</td><td></td><td></td><td></td><td></td><td></td></tr> <tr><td>11. Calculating measures of association with relative risk or odds ratio?</td><td></td><td></td><td></td><td></td><td></td></tr> <tr><td>12. Conducting problem analysis to identify root cause of a problem?</td><td></td><td></td><td></td><td></td><td></td></tr> <tr><td>13. Using surveillance data to make recommendation or to take action?</td><td></td><td></td><td></td><td></td><td></td></tr> <tr><td>14. Conducting outbreak investigations?</td><td></td><td></td><td></td><td></td><td></td></tr> <tr><td>15. Making supportive supervisory visits to any reporting sites?</td><td></td><td></td><td></td><td></td><td></td></tr> <tr><td>16. Preparing scientific report?</td><td></td><td></td><td></td><td></td><td></td></tr> <tr><td>17. Conducting immediately reportable disease case investigation?</td><td></td><td></td><td></td><td></td><td></td></tr> <tr><td>18. Preparing surveillance data table using MS excel?</td><td></td><td></td><td></td><td></td><td></td></tr> <tr><td>19. Preparing graph using MS excel?</td><td></td><td></td><td></td><td></td><td></td></tr> <tr><td>20. Communicating through e-mail?</td><td></td><td></td><td></td><td></td><td></td></tr> <tr><td>21. Preparing surveillance report using MS PPT?</td><td></td><td></td><td></td><td></td><td></td></tr> <tr><td>22. Presenting report to scientific community?</td><td></td><td></td><td></td><td></td><td></td></tr> <tr><td>23. Calculating completeness of surveillance report?</td><td></td><td></td><td></td><td></td><td></td></tr> <tr><td>24. Calculating timeliness of surveillance report?</td><td></td><td></td><td></td><td></td><td></td></tr> <tr><td>25. Conducting informal or formal training on surveillance/PHEM?</td><td></td><td></td><td></td><td></td><td></td></tr> </tbody> </table> |                                                                                                       | Response Options |   |   |  |  | 1                                               | 2 | 3 | 4 | 5 | 1. Collecting or receiving data on reportable diseases? |                                                |  |  |  |  | 2. Reviewing surveillance data for accuracy and consistency? |                                                      |  |  |  |  | 3. Conducting active surveillance/active case search? |                                                    |  |  |  |  | 4. Conducting a surveillance data quality audit? |                                                                  |  |  |  |  | 5. Using surveillance data to make line lists? |  |  |  |  |  | 6. Using surveillance data to make charts/graphs? |  |  |  |  |  | 7. Using surveillance data to make tables? |  |  |  |  |  | 8. Developing weekly bulletin/surveillance summary report? |  |  |  |  |  | 9. Calculating disease frequency with prevalence or incidence? |  |  |  |  |  | 10. Summarizing line list data by mean, median and mode? |  |  |  |  |  | 11. Calculating measures of association with relative risk or odds ratio? |  |  |  |  |  | 12. Conducting problem analysis to identify root cause of a problem? |  |  |  |  |  | 13. Using surveillance data to make recommendation or to take action? |  |  |  |  |  | 14. Conducting outbreak investigations? |  |  |  |  |  | 15. Making supportive supervisory visits to any reporting sites? |  |  |  |  |  | 16. Preparing scientific report? |  |  |  |  |  | 17. Conducting immediately reportable disease case investigation? |  |  |  |  |  | 18. Preparing surveillance data table using MS excel? |  |  |  |  |  | 19. Preparing graph using MS excel? |  |  |  |  |  | 20. Communicating through e-mail? |  |  |  |  |  | 21. Preparing surveillance report using MS PPT? |  |  |  |  |  | 22. Presenting report to scientific community? |  |  |  |  |  | 23. Calculating completeness of surveillance report? |  |  |  |  |  | 24. Calculating timeliness of surveillance report? |  |  |  |  |  | 25. Conducting informal or formal training on surveillance/PHEM? |  |  |  |  |  |  |  |  |  |
|                                                                           | Response Options                                                                                                                                                                                                                                                                                                                                                                                                                                                                                                                                                                                                                                                                                                                                                                                                                                                                                                                                                                                                                                                                                                                                                                                                                                                                                                                                                                                                                                                                                                                                                                                                                                                                                                                                                                                                                                                                                                                                                                                                                                                                                                                                                                                                                                                                                                                                                                                                                                                                                                                                                                                                                                                                                                                                                                                                                                                                                                                                                                                                                                                                                                                                                                                                                                                                                                                                                                                                                                                                                                                                                                                                                                                                                                                                                                                                                                                                                                                 |                                                                                                       |                  |   |   |  |  |                                                 |   |   |   |   |                                                         |                                                |  |  |  |  |                                                              |                                                      |  |  |  |  |                                                       |                                                    |  |  |  |  |                                                  |                                                                  |  |  |  |  |                                                |  |  |  |  |  |                                                   |  |  |  |  |  |                                            |  |  |  |  |  |                                                            |  |  |  |  |  |                                                                |  |  |  |  |  |                                                          |  |  |  |  |  |                                                                           |  |  |  |  |  |                                                                      |  |  |  |  |  |                                                                       |  |  |  |  |  |                                         |  |  |  |  |  |                                                                  |  |  |  |  |  |                                  |  |  |  |  |  |                                                                   |  |  |  |  |  |                                                       |  |  |  |  |  |                                     |  |  |  |  |  |                                   |  |  |  |  |  |                                                 |  |  |  |  |  |                                                |  |  |  |  |  |                                                      |  |  |  |  |  |                                                    |  |  |  |  |  |                                                                  |  |  |  |  |  |  |  |  |  |
|                                                                           | 1                                                                                                                                                                                                                                                                                                                                                                                                                                                                                                                                                                                                                                                                                                                                                                                                                                                                                                                                                                                                                                                                                                                                                                                                                                                                                                                                                                                                                                                                                                                                                                                                                                                                                                                                                                                                                                                                                                                                                                                                                                                                                                                                                                                                                                                                                                                                                                                                                                                                                                                                                                                                                                                                                                                                                                                                                                                                                                                                                                                                                                                                                                                                                                                                                                                                                                                                                                                                                                                                                                                                                                                                                                                                                                                                                                                                                                                                                                                                | 2                                                                                                     | 3                | 4 | 5 |  |  |                                                 |   |   |   |   |                                                         |                                                |  |  |  |  |                                                              |                                                      |  |  |  |  |                                                       |                                                    |  |  |  |  |                                                  |                                                                  |  |  |  |  |                                                |  |  |  |  |  |                                                   |  |  |  |  |  |                                            |  |  |  |  |  |                                                            |  |  |  |  |  |                                                                |  |  |  |  |  |                                                          |  |  |  |  |  |                                                                           |  |  |  |  |  |                                                                      |  |  |  |  |  |                                                                       |  |  |  |  |  |                                         |  |  |  |  |  |                                                                  |  |  |  |  |  |                                  |  |  |  |  |  |                                                                   |  |  |  |  |  |                                                       |  |  |  |  |  |                                     |  |  |  |  |  |                                   |  |  |  |  |  |                                                 |  |  |  |  |  |                                                |  |  |  |  |  |                                                      |  |  |  |  |  |                                                    |  |  |  |  |  |                                                                  |  |  |  |  |  |  |  |  |  |
| 1. Collecting or receiving data on reportable diseases?                   |                                                                                                                                                                                                                                                                                                                                                                                                                                                                                                                                                                                                                                                                                                                                                                                                                                                                                                                                                                                                                                                                                                                                                                                                                                                                                                                                                                                                                                                                                                                                                                                                                                                                                                                                                                                                                                                                                                                                                                                                                                                                                                                                                                                                                                                                                                                                                                                                                                                                                                                                                                                                                                                                                                                                                                                                                                                                                                                                                                                                                                                                                                                                                                                                                                                                                                                                                                                                                                                                                                                                                                                                                                                                                                                                                                                                                                                                                                                                  |                                                                                                       |                  |   |   |  |  |                                                 |   |   |   |   |                                                         |                                                |  |  |  |  |                                                              |                                                      |  |  |  |  |                                                       |                                                    |  |  |  |  |                                                  |                                                                  |  |  |  |  |                                                |  |  |  |  |  |                                                   |  |  |  |  |  |                                            |  |  |  |  |  |                                                            |  |  |  |  |  |                                                                |  |  |  |  |  |                                                          |  |  |  |  |  |                                                                           |  |  |  |  |  |                                                                      |  |  |  |  |  |                                                                       |  |  |  |  |  |                                         |  |  |  |  |  |                                                                  |  |  |  |  |  |                                  |  |  |  |  |  |                                                                   |  |  |  |  |  |                                                       |  |  |  |  |  |                                     |  |  |  |  |  |                                   |  |  |  |  |  |                                                 |  |  |  |  |  |                                                |  |  |  |  |  |                                                      |  |  |  |  |  |                                                    |  |  |  |  |  |                                                                  |  |  |  |  |  |  |  |  |  |
| 2. Reviewing surveillance data for accuracy and consistency?              |                                                                                                                                                                                                                                                                                                                                                                                                                                                                                                                                                                                                                                                                                                                                                                                                                                                                                                                                                                                                                                                                                                                                                                                                                                                                                                                                                                                                                                                                                                                                                                                                                                                                                                                                                                                                                                                                                                                                                                                                                                                                                                                                                                                                                                                                                                                                                                                                                                                                                                                                                                                                                                                                                                                                                                                                                                                                                                                                                                                                                                                                                                                                                                                                                                                                                                                                                                                                                                                                                                                                                                                                                                                                                                                                                                                                                                                                                                                                  |                                                                                                       |                  |   |   |  |  |                                                 |   |   |   |   |                                                         |                                                |  |  |  |  |                                                              |                                                      |  |  |  |  |                                                       |                                                    |  |  |  |  |                                                  |                                                                  |  |  |  |  |                                                |  |  |  |  |  |                                                   |  |  |  |  |  |                                            |  |  |  |  |  |                                                            |  |  |  |  |  |                                                                |  |  |  |  |  |                                                          |  |  |  |  |  |                                                                           |  |  |  |  |  |                                                                      |  |  |  |  |  |                                                                       |  |  |  |  |  |                                         |  |  |  |  |  |                                                                  |  |  |  |  |  |                                  |  |  |  |  |  |                                                                   |  |  |  |  |  |                                                       |  |  |  |  |  |                                     |  |  |  |  |  |                                   |  |  |  |  |  |                                                 |  |  |  |  |  |                                                |  |  |  |  |  |                                                      |  |  |  |  |  |                                                    |  |  |  |  |  |                                                                  |  |  |  |  |  |  |  |  |  |
| 3. Conducting active surveillance/active case search?                     |                                                                                                                                                                                                                                                                                                                                                                                                                                                                                                                                                                                                                                                                                                                                                                                                                                                                                                                                                                                                                                                                                                                                                                                                                                                                                                                                                                                                                                                                                                                                                                                                                                                                                                                                                                                                                                                                                                                                                                                                                                                                                                                                                                                                                                                                                                                                                                                                                                                                                                                                                                                                                                                                                                                                                                                                                                                                                                                                                                                                                                                                                                                                                                                                                                                                                                                                                                                                                                                                                                                                                                                                                                                                                                                                                                                                                                                                                                                                  |                                                                                                       |                  |   |   |  |  |                                                 |   |   |   |   |                                                         |                                                |  |  |  |  |                                                              |                                                      |  |  |  |  |                                                       |                                                    |  |  |  |  |                                                  |                                                                  |  |  |  |  |                                                |  |  |  |  |  |                                                   |  |  |  |  |  |                                            |  |  |  |  |  |                                                            |  |  |  |  |  |                                                                |  |  |  |  |  |                                                          |  |  |  |  |  |                                                                           |  |  |  |  |  |                                                                      |  |  |  |  |  |                                                                       |  |  |  |  |  |                                         |  |  |  |  |  |                                                                  |  |  |  |  |  |                                  |  |  |  |  |  |                                                                   |  |  |  |  |  |                                                       |  |  |  |  |  |                                     |  |  |  |  |  |                                   |  |  |  |  |  |                                                 |  |  |  |  |  |                                                |  |  |  |  |  |                                                      |  |  |  |  |  |                                                    |  |  |  |  |  |                                                                  |  |  |  |  |  |  |  |  |  |
| 4. Conducting a surveillance data quality audit?                          |                                                                                                                                                                                                                                                                                                                                                                                                                                                                                                                                                                                                                                                                                                                                                                                                                                                                                                                                                                                                                                                                                                                                                                                                                                                                                                                                                                                                                                                                                                                                                                                                                                                                                                                                                                                                                                                                                                                                                                                                                                                                                                                                                                                                                                                                                                                                                                                                                                                                                                                                                                                                                                                                                                                                                                                                                                                                                                                                                                                                                                                                                                                                                                                                                                                                                                                                                                                                                                                                                                                                                                                                                                                                                                                                                                                                                                                                                                                                  |                                                                                                       |                  |   |   |  |  |                                                 |   |   |   |   |                                                         |                                                |  |  |  |  |                                                              |                                                      |  |  |  |  |                                                       |                                                    |  |  |  |  |                                                  |                                                                  |  |  |  |  |                                                |  |  |  |  |  |                                                   |  |  |  |  |  |                                            |  |  |  |  |  |                                                            |  |  |  |  |  |                                                                |  |  |  |  |  |                                                          |  |  |  |  |  |                                                                           |  |  |  |  |  |                                                                      |  |  |  |  |  |                                                                       |  |  |  |  |  |                                         |  |  |  |  |  |                                                                  |  |  |  |  |  |                                  |  |  |  |  |  |                                                                   |  |  |  |  |  |                                                       |  |  |  |  |  |                                     |  |  |  |  |  |                                   |  |  |  |  |  |                                                 |  |  |  |  |  |                                                |  |  |  |  |  |                                                      |  |  |  |  |  |                                                    |  |  |  |  |  |                                                                  |  |  |  |  |  |  |  |  |  |
| 5. Using surveillance data to make line lists?                            |                                                                                                                                                                                                                                                                                                                                                                                                                                                                                                                                                                                                                                                                                                                                                                                                                                                                                                                                                                                                                                                                                                                                                                                                                                                                                                                                                                                                                                                                                                                                                                                                                                                                                                                                                                                                                                                                                                                                                                                                                                                                                                                                                                                                                                                                                                                                                                                                                                                                                                                                                                                                                                                                                                                                                                                                                                                                                                                                                                                                                                                                                                                                                                                                                                                                                                                                                                                                                                                                                                                                                                                                                                                                                                                                                                                                                                                                                                                                  |                                                                                                       |                  |   |   |  |  |                                                 |   |   |   |   |                                                         |                                                |  |  |  |  |                                                              |                                                      |  |  |  |  |                                                       |                                                    |  |  |  |  |                                                  |                                                                  |  |  |  |  |                                                |  |  |  |  |  |                                                   |  |  |  |  |  |                                            |  |  |  |  |  |                                                            |  |  |  |  |  |                                                                |  |  |  |  |  |                                                          |  |  |  |  |  |                                                                           |  |  |  |  |  |                                                                      |  |  |  |  |  |                                                                       |  |  |  |  |  |                                         |  |  |  |  |  |                                                                  |  |  |  |  |  |                                  |  |  |  |  |  |                                                                   |  |  |  |  |  |                                                       |  |  |  |  |  |                                     |  |  |  |  |  |                                   |  |  |  |  |  |                                                 |  |  |  |  |  |                                                |  |  |  |  |  |                                                      |  |  |  |  |  |                                                    |  |  |  |  |  |                                                                  |  |  |  |  |  |  |  |  |  |
| 6. Using surveillance data to make charts/graphs?                         |                                                                                                                                                                                                                                                                                                                                                                                                                                                                                                                                                                                                                                                                                                                                                                                                                                                                                                                                                                                                                                                                                                                                                                                                                                                                                                                                                                                                                                                                                                                                                                                                                                                                                                                                                                                                                                                                                                                                                                                                                                                                                                                                                                                                                                                                                                                                                                                                                                                                                                                                                                                                                                                                                                                                                                                                                                                                                                                                                                                                                                                                                                                                                                                                                                                                                                                                                                                                                                                                                                                                                                                                                                                                                                                                                                                                                                                                                                                                  |                                                                                                       |                  |   |   |  |  |                                                 |   |   |   |   |                                                         |                                                |  |  |  |  |                                                              |                                                      |  |  |  |  |                                                       |                                                    |  |  |  |  |                                                  |                                                                  |  |  |  |  |                                                |  |  |  |  |  |                                                   |  |  |  |  |  |                                            |  |  |  |  |  |                                                            |  |  |  |  |  |                                                                |  |  |  |  |  |                                                          |  |  |  |  |  |                                                                           |  |  |  |  |  |                                                                      |  |  |  |  |  |                                                                       |  |  |  |  |  |                                         |  |  |  |  |  |                                                                  |  |  |  |  |  |                                  |  |  |  |  |  |                                                                   |  |  |  |  |  |                                                       |  |  |  |  |  |                                     |  |  |  |  |  |                                   |  |  |  |  |  |                                                 |  |  |  |  |  |                                                |  |  |  |  |  |                                                      |  |  |  |  |  |                                                    |  |  |  |  |  |                                                                  |  |  |  |  |  |  |  |  |  |
| 7. Using surveillance data to make tables?                                |                                                                                                                                                                                                                                                                                                                                                                                                                                                                                                                                                                                                                                                                                                                                                                                                                                                                                                                                                                                                                                                                                                                                                                                                                                                                                                                                                                                                                                                                                                                                                                                                                                                                                                                                                                                                                                                                                                                                                                                                                                                                                                                                                                                                                                                                                                                                                                                                                                                                                                                                                                                                                                                                                                                                                                                                                                                                                                                                                                                                                                                                                                                                                                                                                                                                                                                                                                                                                                                                                                                                                                                                                                                                                                                                                                                                                                                                                                                                  |                                                                                                       |                  |   |   |  |  |                                                 |   |   |   |   |                                                         |                                                |  |  |  |  |                                                              |                                                      |  |  |  |  |                                                       |                                                    |  |  |  |  |                                                  |                                                                  |  |  |  |  |                                                |  |  |  |  |  |                                                   |  |  |  |  |  |                                            |  |  |  |  |  |                                                            |  |  |  |  |  |                                                                |  |  |  |  |  |                                                          |  |  |  |  |  |                                                                           |  |  |  |  |  |                                                                      |  |  |  |  |  |                                                                       |  |  |  |  |  |                                         |  |  |  |  |  |                                                                  |  |  |  |  |  |                                  |  |  |  |  |  |                                                                   |  |  |  |  |  |                                                       |  |  |  |  |  |                                     |  |  |  |  |  |                                   |  |  |  |  |  |                                                 |  |  |  |  |  |                                                |  |  |  |  |  |                                                      |  |  |  |  |  |                                                    |  |  |  |  |  |                                                                  |  |  |  |  |  |  |  |  |  |
| 8. Developing weekly bulletin/surveillance summary report?                |                                                                                                                                                                                                                                                                                                                                                                                                                                                                                                                                                                                                                                                                                                                                                                                                                                                                                                                                                                                                                                                                                                                                                                                                                                                                                                                                                                                                                                                                                                                                                                                                                                                                                                                                                                                                                                                                                                                                                                                                                                                                                                                                                                                                                                                                                                                                                                                                                                                                                                                                                                                                                                                                                                                                                                                                                                                                                                                                                                                                                                                                                                                                                                                                                                                                                                                                                                                                                                                                                                                                                                                                                                                                                                                                                                                                                                                                                                                                  |                                                                                                       |                  |   |   |  |  |                                                 |   |   |   |   |                                                         |                                                |  |  |  |  |                                                              |                                                      |  |  |  |  |                                                       |                                                    |  |  |  |  |                                                  |                                                                  |  |  |  |  |                                                |  |  |  |  |  |                                                   |  |  |  |  |  |                                            |  |  |  |  |  |                                                            |  |  |  |  |  |                                                                |  |  |  |  |  |                                                          |  |  |  |  |  |                                                                           |  |  |  |  |  |                                                                      |  |  |  |  |  |                                                                       |  |  |  |  |  |                                         |  |  |  |  |  |                                                                  |  |  |  |  |  |                                  |  |  |  |  |  |                                                                   |  |  |  |  |  |                                                       |  |  |  |  |  |                                     |  |  |  |  |  |                                   |  |  |  |  |  |                                                 |  |  |  |  |  |                                                |  |  |  |  |  |                                                      |  |  |  |  |  |                                                    |  |  |  |  |  |                                                                  |  |  |  |  |  |  |  |  |  |
| 9. Calculating disease frequency with prevalence or incidence?            |                                                                                                                                                                                                                                                                                                                                                                                                                                                                                                                                                                                                                                                                                                                                                                                                                                                                                                                                                                                                                                                                                                                                                                                                                                                                                                                                                                                                                                                                                                                                                                                                                                                                                                                                                                                                                                                                                                                                                                                                                                                                                                                                                                                                                                                                                                                                                                                                                                                                                                                                                                                                                                                                                                                                                                                                                                                                                                                                                                                                                                                                                                                                                                                                                                                                                                                                                                                                                                                                                                                                                                                                                                                                                                                                                                                                                                                                                                                                  |                                                                                                       |                  |   |   |  |  |                                                 |   |   |   |   |                                                         |                                                |  |  |  |  |                                                              |                                                      |  |  |  |  |                                                       |                                                    |  |  |  |  |                                                  |                                                                  |  |  |  |  |                                                |  |  |  |  |  |                                                   |  |  |  |  |  |                                            |  |  |  |  |  |                                                            |  |  |  |  |  |                                                                |  |  |  |  |  |                                                          |  |  |  |  |  |                                                                           |  |  |  |  |  |                                                                      |  |  |  |  |  |                                                                       |  |  |  |  |  |                                         |  |  |  |  |  |                                                                  |  |  |  |  |  |                                  |  |  |  |  |  |                                                                   |  |  |  |  |  |                                                       |  |  |  |  |  |                                     |  |  |  |  |  |                                   |  |  |  |  |  |                                                 |  |  |  |  |  |                                                |  |  |  |  |  |                                                      |  |  |  |  |  |                                                    |  |  |  |  |  |                                                                  |  |  |  |  |  |  |  |  |  |
| 10. Summarizing line list data by mean, median and mode?                  |                                                                                                                                                                                                                                                                                                                                                                                                                                                                                                                                                                                                                                                                                                                                                                                                                                                                                                                                                                                                                                                                                                                                                                                                                                                                                                                                                                                                                                                                                                                                                                                                                                                                                                                                                                                                                                                                                                                                                                                                                                                                                                                                                                                                                                                                                                                                                                                                                                                                                                                                                                                                                                                                                                                                                                                                                                                                                                                                                                                                                                                                                                                                                                                                                                                                                                                                                                                                                                                                                                                                                                                                                                                                                                                                                                                                                                                                                                                                  |                                                                                                       |                  |   |   |  |  |                                                 |   |   |   |   |                                                         |                                                |  |  |  |  |                                                              |                                                      |  |  |  |  |                                                       |                                                    |  |  |  |  |                                                  |                                                                  |  |  |  |  |                                                |  |  |  |  |  |                                                   |  |  |  |  |  |                                            |  |  |  |  |  |                                                            |  |  |  |  |  |                                                                |  |  |  |  |  |                                                          |  |  |  |  |  |                                                                           |  |  |  |  |  |                                                                      |  |  |  |  |  |                                                                       |  |  |  |  |  |                                         |  |  |  |  |  |                                                                  |  |  |  |  |  |                                  |  |  |  |  |  |                                                                   |  |  |  |  |  |                                                       |  |  |  |  |  |                                     |  |  |  |  |  |                                   |  |  |  |  |  |                                                 |  |  |  |  |  |                                                |  |  |  |  |  |                                                      |  |  |  |  |  |                                                    |  |  |  |  |  |                                                                  |  |  |  |  |  |  |  |  |  |
| 11. Calculating measures of association with relative risk or odds ratio? |                                                                                                                                                                                                                                                                                                                                                                                                                                                                                                                                                                                                                                                                                                                                                                                                                                                                                                                                                                                                                                                                                                                                                                                                                                                                                                                                                                                                                                                                                                                                                                                                                                                                                                                                                                                                                                                                                                                                                                                                                                                                                                                                                                                                                                                                                                                                                                                                                                                                                                                                                                                                                                                                                                                                                                                                                                                                                                                                                                                                                                                                                                                                                                                                                                                                                                                                                                                                                                                                                                                                                                                                                                                                                                                                                                                                                                                                                                                                  |                                                                                                       |                  |   |   |  |  |                                                 |   |   |   |   |                                                         |                                                |  |  |  |  |                                                              |                                                      |  |  |  |  |                                                       |                                                    |  |  |  |  |                                                  |                                                                  |  |  |  |  |                                                |  |  |  |  |  |                                                   |  |  |  |  |  |                                            |  |  |  |  |  |                                                            |  |  |  |  |  |                                                                |  |  |  |  |  |                                                          |  |  |  |  |  |                                                                           |  |  |  |  |  |                                                                      |  |  |  |  |  |                                                                       |  |  |  |  |  |                                         |  |  |  |  |  |                                                                  |  |  |  |  |  |                                  |  |  |  |  |  |                                                                   |  |  |  |  |  |                                                       |  |  |  |  |  |                                     |  |  |  |  |  |                                   |  |  |  |  |  |                                                 |  |  |  |  |  |                                                |  |  |  |  |  |                                                      |  |  |  |  |  |                                                    |  |  |  |  |  |                                                                  |  |  |  |  |  |  |  |  |  |
| 12. Conducting problem analysis to identify root cause of a problem?      |                                                                                                                                                                                                                                                                                                                                                                                                                                                                                                                                                                                                                                                                                                                                                                                                                                                                                                                                                                                                                                                                                                                                                                                                                                                                                                                                                                                                                                                                                                                                                                                                                                                                                                                                                                                                                                                                                                                                                                                                                                                                                                                                                                                                                                                                                                                                                                                                                                                                                                                                                                                                                                                                                                                                                                                                                                                                                                                                                                                                                                                                                                                                                                                                                                                                                                                                                                                                                                                                                                                                                                                                                                                                                                                                                                                                                                                                                                                                  |                                                                                                       |                  |   |   |  |  |                                                 |   |   |   |   |                                                         |                                                |  |  |  |  |                                                              |                                                      |  |  |  |  |                                                       |                                                    |  |  |  |  |                                                  |                                                                  |  |  |  |  |                                                |  |  |  |  |  |                                                   |  |  |  |  |  |                                            |  |  |  |  |  |                                                            |  |  |  |  |  |                                                                |  |  |  |  |  |                                                          |  |  |  |  |  |                                                                           |  |  |  |  |  |                                                                      |  |  |  |  |  |                                                                       |  |  |  |  |  |                                         |  |  |  |  |  |                                                                  |  |  |  |  |  |                                  |  |  |  |  |  |                                                                   |  |  |  |  |  |                                                       |  |  |  |  |  |                                     |  |  |  |  |  |                                   |  |  |  |  |  |                                                 |  |  |  |  |  |                                                |  |  |  |  |  |                                                      |  |  |  |  |  |                                                    |  |  |  |  |  |                                                                  |  |  |  |  |  |  |  |  |  |
| 13. Using surveillance data to make recommendation or to take action?     |                                                                                                                                                                                                                                                                                                                                                                                                                                                                                                                                                                                                                                                                                                                                                                                                                                                                                                                                                                                                                                                                                                                                                                                                                                                                                                                                                                                                                                                                                                                                                                                                                                                                                                                                                                                                                                                                                                                                                                                                                                                                                                                                                                                                                                                                                                                                                                                                                                                                                                                                                                                                                                                                                                                                                                                                                                                                                                                                                                                                                                                                                                                                                                                                                                                                                                                                                                                                                                                                                                                                                                                                                                                                                                                                                                                                                                                                                                                                  |                                                                                                       |                  |   |   |  |  |                                                 |   |   |   |   |                                                         |                                                |  |  |  |  |                                                              |                                                      |  |  |  |  |                                                       |                                                    |  |  |  |  |                                                  |                                                                  |  |  |  |  |                                                |  |  |  |  |  |                                                   |  |  |  |  |  |                                            |  |  |  |  |  |                                                            |  |  |  |  |  |                                                                |  |  |  |  |  |                                                          |  |  |  |  |  |                                                                           |  |  |  |  |  |                                                                      |  |  |  |  |  |                                                                       |  |  |  |  |  |                                         |  |  |  |  |  |                                                                  |  |  |  |  |  |                                  |  |  |  |  |  |                                                                   |  |  |  |  |  |                                                       |  |  |  |  |  |                                     |  |  |  |  |  |                                   |  |  |  |  |  |                                                 |  |  |  |  |  |                                                |  |  |  |  |  |                                                      |  |  |  |  |  |                                                    |  |  |  |  |  |                                                                  |  |  |  |  |  |  |  |  |  |
| 14. Conducting outbreak investigations?                                   |                                                                                                                                                                                                                                                                                                                                                                                                                                                                                                                                                                                                                                                                                                                                                                                                                                                                                                                                                                                                                                                                                                                                                                                                                                                                                                                                                                                                                                                                                                                                                                                                                                                                                                                                                                                                                                                                                                                                                                                                                                                                                                                                                                                                                                                                                                                                                                                                                                                                                                                                                                                                                                                                                                                                                                                                                                                                                                                                                                                                                                                                                                                                                                                                                                                                                                                                                                                                                                                                                                                                                                                                                                                                                                                                                                                                                                                                                                                                  |                                                                                                       |                  |   |   |  |  |                                                 |   |   |   |   |                                                         |                                                |  |  |  |  |                                                              |                                                      |  |  |  |  |                                                       |                                                    |  |  |  |  |                                                  |                                                                  |  |  |  |  |                                                |  |  |  |  |  |                                                   |  |  |  |  |  |                                            |  |  |  |  |  |                                                            |  |  |  |  |  |                                                                |  |  |  |  |  |                                                          |  |  |  |  |  |                                                                           |  |  |  |  |  |                                                                      |  |  |  |  |  |                                                                       |  |  |  |  |  |                                         |  |  |  |  |  |                                                                  |  |  |  |  |  |                                  |  |  |  |  |  |                                                                   |  |  |  |  |  |                                                       |  |  |  |  |  |                                     |  |  |  |  |  |                                   |  |  |  |  |  |                                                 |  |  |  |  |  |                                                |  |  |  |  |  |                                                      |  |  |  |  |  |                                                    |  |  |  |  |  |                                                                  |  |  |  |  |  |  |  |  |  |
| 15. Making supportive supervisory visits to any reporting sites?          |                                                                                                                                                                                                                                                                                                                                                                                                                                                                                                                                                                                                                                                                                                                                                                                                                                                                                                                                                                                                                                                                                                                                                                                                                                                                                                                                                                                                                                                                                                                                                                                                                                                                                                                                                                                                                                                                                                                                                                                                                                                                                                                                                                                                                                                                                                                                                                                                                                                                                                                                                                                                                                                                                                                                                                                                                                                                                                                                                                                                                                                                                                                                                                                                                                                                                                                                                                                                                                                                                                                                                                                                                                                                                                                                                                                                                                                                                                                                  |                                                                                                       |                  |   |   |  |  |                                                 |   |   |   |   |                                                         |                                                |  |  |  |  |                                                              |                                                      |  |  |  |  |                                                       |                                                    |  |  |  |  |                                                  |                                                                  |  |  |  |  |                                                |  |  |  |  |  |                                                   |  |  |  |  |  |                                            |  |  |  |  |  |                                                            |  |  |  |  |  |                                                                |  |  |  |  |  |                                                          |  |  |  |  |  |                                                                           |  |  |  |  |  |                                                                      |  |  |  |  |  |                                                                       |  |  |  |  |  |                                         |  |  |  |  |  |                                                                  |  |  |  |  |  |                                  |  |  |  |  |  |                                                                   |  |  |  |  |  |                                                       |  |  |  |  |  |                                     |  |  |  |  |  |                                   |  |  |  |  |  |                                                 |  |  |  |  |  |                                                |  |  |  |  |  |                                                      |  |  |  |  |  |                                                    |  |  |  |  |  |                                                                  |  |  |  |  |  |  |  |  |  |
| 16. Preparing scientific report?                                          |                                                                                                                                                                                                                                                                                                                                                                                                                                                                                                                                                                                                                                                                                                                                                                                                                                                                                                                                                                                                                                                                                                                                                                                                                                                                                                                                                                                                                                                                                                                                                                                                                                                                                                                                                                                                                                                                                                                                                                                                                                                                                                                                                                                                                                                                                                                                                                                                                                                                                                                                                                                                                                                                                                                                                                                                                                                                                                                                                                                                                                                                                                                                                                                                                                                                                                                                                                                                                                                                                                                                                                                                                                                                                                                                                                                                                                                                                                                                  |                                                                                                       |                  |   |   |  |  |                                                 |   |   |   |   |                                                         |                                                |  |  |  |  |                                                              |                                                      |  |  |  |  |                                                       |                                                    |  |  |  |  |                                                  |                                                                  |  |  |  |  |                                                |  |  |  |  |  |                                                   |  |  |  |  |  |                                            |  |  |  |  |  |                                                            |  |  |  |  |  |                                                                |  |  |  |  |  |                                                          |  |  |  |  |  |                                                                           |  |  |  |  |  |                                                                      |  |  |  |  |  |                                                                       |  |  |  |  |  |                                         |  |  |  |  |  |                                                                  |  |  |  |  |  |                                  |  |  |  |  |  |                                                                   |  |  |  |  |  |                                                       |  |  |  |  |  |                                     |  |  |  |  |  |                                   |  |  |  |  |  |                                                 |  |  |  |  |  |                                                |  |  |  |  |  |                                                      |  |  |  |  |  |                                                    |  |  |  |  |  |                                                                  |  |  |  |  |  |  |  |  |  |
| 17. Conducting immediately reportable disease case investigation?         |                                                                                                                                                                                                                                                                                                                                                                                                                                                                                                                                                                                                                                                                                                                                                                                                                                                                                                                                                                                                                                                                                                                                                                                                                                                                                                                                                                                                                                                                                                                                                                                                                                                                                                                                                                                                                                                                                                                                                                                                                                                                                                                                                                                                                                                                                                                                                                                                                                                                                                                                                                                                                                                                                                                                                                                                                                                                                                                                                                                                                                                                                                                                                                                                                                                                                                                                                                                                                                                                                                                                                                                                                                                                                                                                                                                                                                                                                                                                  |                                                                                                       |                  |   |   |  |  |                                                 |   |   |   |   |                                                         |                                                |  |  |  |  |                                                              |                                                      |  |  |  |  |                                                       |                                                    |  |  |  |  |                                                  |                                                                  |  |  |  |  |                                                |  |  |  |  |  |                                                   |  |  |  |  |  |                                            |  |  |  |  |  |                                                            |  |  |  |  |  |                                                                |  |  |  |  |  |                                                          |  |  |  |  |  |                                                                           |  |  |  |  |  |                                                                      |  |  |  |  |  |                                                                       |  |  |  |  |  |                                         |  |  |  |  |  |                                                                  |  |  |  |  |  |                                  |  |  |  |  |  |                                                                   |  |  |  |  |  |                                                       |  |  |  |  |  |                                     |  |  |  |  |  |                                   |  |  |  |  |  |                                                 |  |  |  |  |  |                                                |  |  |  |  |  |                                                      |  |  |  |  |  |                                                    |  |  |  |  |  |                                                                  |  |  |  |  |  |  |  |  |  |
| 18. Preparing surveillance data table using MS excel?                     |                                                                                                                                                                                                                                                                                                                                                                                                                                                                                                                                                                                                                                                                                                                                                                                                                                                                                                                                                                                                                                                                                                                                                                                                                                                                                                                                                                                                                                                                                                                                                                                                                                                                                                                                                                                                                                                                                                                                                                                                                                                                                                                                                                                                                                                                                                                                                                                                                                                                                                                                                                                                                                                                                                                                                                                                                                                                                                                                                                                                                                                                                                                                                                                                                                                                                                                                                                                                                                                                                                                                                                                                                                                                                                                                                                                                                                                                                                                                  |                                                                                                       |                  |   |   |  |  |                                                 |   |   |   |   |                                                         |                                                |  |  |  |  |                                                              |                                                      |  |  |  |  |                                                       |                                                    |  |  |  |  |                                                  |                                                                  |  |  |  |  |                                                |  |  |  |  |  |                                                   |  |  |  |  |  |                                            |  |  |  |  |  |                                                            |  |  |  |  |  |                                                                |  |  |  |  |  |                                                          |  |  |  |  |  |                                                                           |  |  |  |  |  |                                                                      |  |  |  |  |  |                                                                       |  |  |  |  |  |                                         |  |  |  |  |  |                                                                  |  |  |  |  |  |                                  |  |  |  |  |  |                                                                   |  |  |  |  |  |                                                       |  |  |  |  |  |                                     |  |  |  |  |  |                                   |  |  |  |  |  |                                                 |  |  |  |  |  |                                                |  |  |  |  |  |                                                      |  |  |  |  |  |                                                    |  |  |  |  |  |                                                                  |  |  |  |  |  |  |  |  |  |
| 19. Preparing graph using MS excel?                                       |                                                                                                                                                                                                                                                                                                                                                                                                                                                                                                                                                                                                                                                                                                                                                                                                                                                                                                                                                                                                                                                                                                                                                                                                                                                                                                                                                                                                                                                                                                                                                                                                                                                                                                                                                                                                                                                                                                                                                                                                                                                                                                                                                                                                                                                                                                                                                                                                                                                                                                                                                                                                                                                                                                                                                                                                                                                                                                                                                                                                                                                                                                                                                                                                                                                                                                                                                                                                                                                                                                                                                                                                                                                                                                                                                                                                                                                                                                                                  |                                                                                                       |                  |   |   |  |  |                                                 |   |   |   |   |                                                         |                                                |  |  |  |  |                                                              |                                                      |  |  |  |  |                                                       |                                                    |  |  |  |  |                                                  |                                                                  |  |  |  |  |                                                |  |  |  |  |  |                                                   |  |  |  |  |  |                                            |  |  |  |  |  |                                                            |  |  |  |  |  |                                                                |  |  |  |  |  |                                                          |  |  |  |  |  |                                                                           |  |  |  |  |  |                                                                      |  |  |  |  |  |                                                                       |  |  |  |  |  |                                         |  |  |  |  |  |                                                                  |  |  |  |  |  |                                  |  |  |  |  |  |                                                                   |  |  |  |  |  |                                                       |  |  |  |  |  |                                     |  |  |  |  |  |                                   |  |  |  |  |  |                                                 |  |  |  |  |  |                                                |  |  |  |  |  |                                                      |  |  |  |  |  |                                                    |  |  |  |  |  |                                                                  |  |  |  |  |  |  |  |  |  |
| 20. Communicating through e-mail?                                         |                                                                                                                                                                                                                                                                                                                                                                                                                                                                                                                                                                                                                                                                                                                                                                                                                                                                                                                                                                                                                                                                                                                                                                                                                                                                                                                                                                                                                                                                                                                                                                                                                                                                                                                                                                                                                                                                                                                                                                                                                                                                                                                                                                                                                                                                                                                                                                                                                                                                                                                                                                                                                                                                                                                                                                                                                                                                                                                                                                                                                                                                                                                                                                                                                                                                                                                                                                                                                                                                                                                                                                                                                                                                                                                                                                                                                                                                                                                                  |                                                                                                       |                  |   |   |  |  |                                                 |   |   |   |   |                                                         |                                                |  |  |  |  |                                                              |                                                      |  |  |  |  |                                                       |                                                    |  |  |  |  |                                                  |                                                                  |  |  |  |  |                                                |  |  |  |  |  |                                                   |  |  |  |  |  |                                            |  |  |  |  |  |                                                            |  |  |  |  |  |                                                                |  |  |  |  |  |                                                          |  |  |  |  |  |                                                                           |  |  |  |  |  |                                                                      |  |  |  |  |  |                                                                       |  |  |  |  |  |                                         |  |  |  |  |  |                                                                  |  |  |  |  |  |                                  |  |  |  |  |  |                                                                   |  |  |  |  |  |                                                       |  |  |  |  |  |                                     |  |  |  |  |  |                                   |  |  |  |  |  |                                                 |  |  |  |  |  |                                                |  |  |  |  |  |                                                      |  |  |  |  |  |                                                    |  |  |  |  |  |                                                                  |  |  |  |  |  |  |  |  |  |
| 21. Preparing surveillance report using MS PPT?                           |                                                                                                                                                                                                                                                                                                                                                                                                                                                                                                                                                                                                                                                                                                                                                                                                                                                                                                                                                                                                                                                                                                                                                                                                                                                                                                                                                                                                                                                                                                                                                                                                                                                                                                                                                                                                                                                                                                                                                                                                                                                                                                                                                                                                                                                                                                                                                                                                                                                                                                                                                                                                                                                                                                                                                                                                                                                                                                                                                                                                                                                                                                                                                                                                                                                                                                                                                                                                                                                                                                                                                                                                                                                                                                                                                                                                                                                                                                                                  |                                                                                                       |                  |   |   |  |  |                                                 |   |   |   |   |                                                         |                                                |  |  |  |  |                                                              |                                                      |  |  |  |  |                                                       |                                                    |  |  |  |  |                                                  |                                                                  |  |  |  |  |                                                |  |  |  |  |  |                                                   |  |  |  |  |  |                                            |  |  |  |  |  |                                                            |  |  |  |  |  |                                                                |  |  |  |  |  |                                                          |  |  |  |  |  |                                                                           |  |  |  |  |  |                                                                      |  |  |  |  |  |                                                                       |  |  |  |  |  |                                         |  |  |  |  |  |                                                                  |  |  |  |  |  |                                  |  |  |  |  |  |                                                                   |  |  |  |  |  |                                                       |  |  |  |  |  |                                     |  |  |  |  |  |                                   |  |  |  |  |  |                                                 |  |  |  |  |  |                                                |  |  |  |  |  |                                                      |  |  |  |  |  |                                                    |  |  |  |  |  |                                                                  |  |  |  |  |  |  |  |  |  |
| 22. Presenting report to scientific community?                            |                                                                                                                                                                                                                                                                                                                                                                                                                                                                                                                                                                                                                                                                                                                                                                                                                                                                                                                                                                                                                                                                                                                                                                                                                                                                                                                                                                                                                                                                                                                                                                                                                                                                                                                                                                                                                                                                                                                                                                                                                                                                                                                                                                                                                                                                                                                                                                                                                                                                                                                                                                                                                                                                                                                                                                                                                                                                                                                                                                                                                                                                                                                                                                                                                                                                                                                                                                                                                                                                                                                                                                                                                                                                                                                                                                                                                                                                                                                                  |                                                                                                       |                  |   |   |  |  |                                                 |   |   |   |   |                                                         |                                                |  |  |  |  |                                                              |                                                      |  |  |  |  |                                                       |                                                    |  |  |  |  |                                                  |                                                                  |  |  |  |  |                                                |  |  |  |  |  |                                                   |  |  |  |  |  |                                            |  |  |  |  |  |                                                            |  |  |  |  |  |                                                                |  |  |  |  |  |                                                          |  |  |  |  |  |                                                                           |  |  |  |  |  |                                                                      |  |  |  |  |  |                                                                       |  |  |  |  |  |                                         |  |  |  |  |  |                                                                  |  |  |  |  |  |                                  |  |  |  |  |  |                                                                   |  |  |  |  |  |                                                       |  |  |  |  |  |                                     |  |  |  |  |  |                                   |  |  |  |  |  |                                                 |  |  |  |  |  |                                                |  |  |  |  |  |                                                      |  |  |  |  |  |                                                    |  |  |  |  |  |                                                                  |  |  |  |  |  |  |  |  |  |
| 23. Calculating completeness of surveillance report?                      |                                                                                                                                                                                                                                                                                                                                                                                                                                                                                                                                                                                                                                                                                                                                                                                                                                                                                                                                                                                                                                                                                                                                                                                                                                                                                                                                                                                                                                                                                                                                                                                                                                                                                                                                                                                                                                                                                                                                                                                                                                                                                                                                                                                                                                                                                                                                                                                                                                                                                                                                                                                                                                                                                                                                                                                                                                                                                                                                                                                                                                                                                                                                                                                                                                                                                                                                                                                                                                                                                                                                                                                                                                                                                                                                                                                                                                                                                                                                  |                                                                                                       |                  |   |   |  |  |                                                 |   |   |   |   |                                                         |                                                |  |  |  |  |                                                              |                                                      |  |  |  |  |                                                       |                                                    |  |  |  |  |                                                  |                                                                  |  |  |  |  |                                                |  |  |  |  |  |                                                   |  |  |  |  |  |                                            |  |  |  |  |  |                                                            |  |  |  |  |  |                                                                |  |  |  |  |  |                                                          |  |  |  |  |  |                                                                           |  |  |  |  |  |                                                                      |  |  |  |  |  |                                                                       |  |  |  |  |  |                                         |  |  |  |  |  |                                                                  |  |  |  |  |  |                                  |  |  |  |  |  |                                                                   |  |  |  |  |  |                                                       |  |  |  |  |  |                                     |  |  |  |  |  |                                   |  |  |  |  |  |                                                 |  |  |  |  |  |                                                |  |  |  |  |  |                                                      |  |  |  |  |  |                                                    |  |  |  |  |  |                                                                  |  |  |  |  |  |  |  |  |  |
| 24. Calculating timeliness of surveillance report?                        |                                                                                                                                                                                                                                                                                                                                                                                                                                                                                                                                                                                                                                                                                                                                                                                                                                                                                                                                                                                                                                                                                                                                                                                                                                                                                                                                                                                                                                                                                                                                                                                                                                                                                                                                                                                                                                                                                                                                                                                                                                                                                                                                                                                                                                                                                                                                                                                                                                                                                                                                                                                                                                                                                                                                                                                                                                                                                                                                                                                                                                                                                                                                                                                                                                                                                                                                                                                                                                                                                                                                                                                                                                                                                                                                                                                                                                                                                                                                  |                                                                                                       |                  |   |   |  |  |                                                 |   |   |   |   |                                                         |                                                |  |  |  |  |                                                              |                                                      |  |  |  |  |                                                       |                                                    |  |  |  |  |                                                  |                                                                  |  |  |  |  |                                                |  |  |  |  |  |                                                   |  |  |  |  |  |                                            |  |  |  |  |  |                                                            |  |  |  |  |  |                                                                |  |  |  |  |  |                                                          |  |  |  |  |  |                                                                           |  |  |  |  |  |                                                                      |  |  |  |  |  |                                                                       |  |  |  |  |  |                                         |  |  |  |  |  |                                                                  |  |  |  |  |  |                                  |  |  |  |  |  |                                                                   |  |  |  |  |  |                                                       |  |  |  |  |  |                                     |  |  |  |  |  |                                   |  |  |  |  |  |                                                 |  |  |  |  |  |                                                |  |  |  |  |  |                                                      |  |  |  |  |  |                                                    |  |  |  |  |  |                                                                  |  |  |  |  |  |  |  |  |  |
| 25. Conducting informal or formal training on surveillance/PHEM?          |                                                                                                                                                                                                                                                                                                                                                                                                                                                                                                                                                                                                                                                                                                                                                                                                                                                                                                                                                                                                                                                                                                                                                                                                                                                                                                                                                                                                                                                                                                                                                                                                                                                                                                                                                                                                                                                                                                                                                                                                                                                                                                                                                                                                                                                                                                                                                                                                                                                                                                                                                                                                                                                                                                                                                                                                                                                                                                                                                                                                                                                                                                                                                                                                                                                                                                                                                                                                                                                                                                                                                                                                                                                                                                                                                                                                                                                                                                                                  |                                                                                                       |                  |   |   |  |  |                                                 |   |   |   |   |                                                         |                                                |  |  |  |  |                                                              |                                                      |  |  |  |  |                                                       |                                                    |  |  |  |  |                                                  |                                                                  |  |  |  |  |                                                |  |  |  |  |  |                                                   |  |  |  |  |  |                                            |  |  |  |  |  |                                                            |  |  |  |  |  |                                                                |  |  |  |  |  |                                                          |  |  |  |  |  |                                                                           |  |  |  |  |  |                                                                      |  |  |  |  |  |                                                                       |  |  |  |  |  |                                         |  |  |  |  |  |                                                                  |  |  |  |  |  |                                  |  |  |  |  |  |                                                                   |  |  |  |  |  |                                                       |  |  |  |  |  |                                     |  |  |  |  |  |                                   |  |  |  |  |  |                                                 |  |  |  |  |  |                                                |  |  |  |  |  |                                                      |  |  |  |  |  |                                                    |  |  |  |  |  |                                                                  |  |  |  |  |  |  |  |  |  |
| 65.                                                                       | <p>Since completing FETP-Frontline, have you made any suggestions or action to improve the surveillance system/process?</p> <p>(This may include modifying surveillance tools, supporting notification, instituting rumor logs, training staff, auditing data, analyzing data in person, time and place etc.)</p>                                                                                                                                                                                                                                                                                                                                                                                                                                                                                                                                                                                                                                                                                                                                                                                                                                                                                                                                                                                                                                                                                                                                                                                                                                                                                                                                                                                                                                                                                                                                                                                                                                                                                                                                                                                                                                                                                                                                                                                                                                                                                                                                                                                                                                                                                                                                                                                                                                                                                                                                                                                                                                                                                                                                                                                                                                                                                                                                                                                                                                                                                                                                                                                                                                                                                                                                                                                                                                                                                                                                                                                                                | <p>1. Yes, please describe your suggestion(s)</p> <p>2. No</p> <p>_____</p> <p>_____</p> <p>_____</p> |                  |   |   |  |  |                                                 |   |   |   |   |                                                         |                                                |  |  |  |  |                                                              |                                                      |  |  |  |  |                                                       |                                                    |  |  |  |  |                                                  |                                                                  |  |  |  |  |                                                |  |  |  |  |  |                                                   |  |  |  |  |  |                                            |  |  |  |  |  |                                                            |  |  |  |  |  |                                                                |  |  |  |  |  |                                                          |  |  |  |  |  |                                                                           |  |  |  |  |  |                                                                      |  |  |  |  |  |                                                                       |  |  |  |  |  |                                         |  |  |  |  |  |                                                                  |  |  |  |  |  |                                  |  |  |  |  |  |                                                                   |  |  |  |  |  |                                                       |  |  |  |  |  |                                     |  |  |  |  |  |                                   |  |  |  |  |  |                                                 |  |  |  |  |  |                                                |  |  |  |  |  |                                                      |  |  |  |  |  |                                                    |  |  |  |  |  |                                                                  |  |  |  |  |  |  |  |  |  |

**Evaluation for FETP-Frontline in Ethiopia**

|                                                                                                                                         |                                                                                                                                                                                                                                                                                                                                                                          |                                                                                |
|-----------------------------------------------------------------------------------------------------------------------------------------|--------------------------------------------------------------------------------------------------------------------------------------------------------------------------------------------------------------------------------------------------------------------------------------------------------------------------------------------------------------------------|--------------------------------------------------------------------------------|
| 66.                                                                                                                                     | If Yes, were any improvements in response to your action or recommendation?                                                                                                                                                                                                                                                                                              | 1. Yes, please describe your suggestion(s)<br>2. No<br>_____<br>_____<br>_____ |
| 67.                                                                                                                                     | Do you face challenges in using the skills acquired from Frontline training to make changes in the surveillance system?<br><br><i>(Probe: No laboratory confirmation, no feedback to/from sites, missing forms, incorrect information records, late reporting, transportation issues, budget issues, lack of access to a computer, reliable electricity power, etc.)</i> | 1. _____<br>2. _____<br>3. _____<br>4. _____<br>_____                          |
| 68.                                                                                                                                     | Of all the things you learned in Frontline training, is there one that has been the most useful?                                                                                                                                                                                                                                                                         | 1. Yes, please specify which one, and why it has been useful<br>2. No<br>_____ |
| 69.                                                                                                                                     | Do you have any other comments or suggestions for FETP-Frontline?                                                                                                                                                                                                                                                                                                        | 1 _____<br>2 _____<br>3 _____<br>_____                                         |
| <b>CLOSING</b><br><b>Thank you for your time and for answering these questions. If you have any other questions, please let us know</b> |                                                                                                                                                                                                                                                                                                                                                                          |                                                                                |



**FETP-FRONTLINE NON-PARTICIPANT ONLY**

70. Now I am going to ask you about your skill in performing some of surveillance activities, and you are kindly requested to rate your skill level according to the scale provided.

- 1. No Skills at all** (Can't perform the activity, no experience)
- 2. Limited Skills** (Perform the activity with major error, few experience)
- 3. Satisfactory Skills** (Perform the activity with some insignificant errors, adequate experience)
- 4. Advanced skills** (Perform the activity with almost no error, good experience)
- 5. Expert Skills** (Perform the activity, excellent experience)

|                                                                           | Response Options |   |   |   |   |
|---------------------------------------------------------------------------|------------------|---|---|---|---|
|                                                                           | 1                | 2 | 3 | 4 | 5 |
| 1. Collecting or receiving data on reportable diseases?                   |                  |   |   |   |   |
| 2. Reviewing surveillance data for accuracy and consistency?              |                  |   |   |   |   |
| 3. Conducting active surveillance/active case search?                     |                  |   |   |   |   |
| 4. Conducting a surveillance data quality audit?                          |                  |   |   |   |   |
| 5. Using surveillance data to make line lists?                            |                  |   |   |   |   |
| 6. Using surveillance data to make charts/graphs?                         |                  |   |   |   |   |
| 7. Using surveillance data to make tables?                                |                  |   |   |   |   |
| 8. Developing weekly bulletin/surveillance summary report?                |                  |   |   |   |   |
| 9. Calculating disease frequency with prevalence or incidence?            |                  |   |   |   |   |
| 10. Summarizing line list data by mean, median and mode?                  |                  |   |   |   |   |
| 11. Calculating measures of association with relative risk or odds ratio? |                  |   |   |   |   |
| 12. Conducting problem analysis to identify root cause of a problem?      |                  |   |   |   |   |
| 13. Using surveillance data to make recommendation or to take action?     |                  |   |   |   |   |
| 14. Conducting outbreak investigations?                                   |                  |   |   |   |   |
| 15. Making supportive supervisory visits to any reporting sites?          |                  |   |   |   |   |
| 16. Preparing scientific report?                                          |                  |   |   |   |   |
| 17. Conducting immediately reportable disease case investigation?         |                  |   |   |   |   |
| 18. Preparing surveillance data table using MS excel?                     |                  |   |   |   |   |
| 19. Preparing graph using MS excel?                                       |                  |   |   |   |   |
| 20. Communicating through e-mail?                                         |                  |   |   |   |   |
| 21. Preparing surveillance report using MS PPT?                           |                  |   |   |   |   |
| 22. Presenting report to scientific community?                            |                  |   |   |   |   |
| 23. Calculating completeness of surveillance report?                      |                  |   |   |   |   |
| 24. Calculating timeliness of surveillance report?                        |                  |   |   |   |   |
| 25. Conducting informal or formal training on surveillance/PHEM?          |                  |   |   |   |   |

**CLOSING**

Thank you for your time and for answering these questions. If you have any other questions, please let us know

## Woreda PHEM Visit Checklist

|                            |
|----------------------------|
| 1. Woreda name:            |
| 2. Zone name:              |
| 3. Region name:            |
| 4. Date of Woreda visit:   |
| 5. Data Collector(s) name: |

### Part I: Availability of surveillance reports

Check for availability of the following reports either as hard copy or soft copy for the last one month or for the last event. Take picture (photo) of the reports.

|     | Type of surveillance report                                                                               | Number Available | Comment |
|-----|-----------------------------------------------------------------------------------------------------------|------------------|---------|
| 6.  | Weekly reporting form (Weekly reportable diseases),<br><b>(Check for last three months or 12 reports)</b> |                  |         |
| 7.  | Case based form (cases of immediately reportable diseases)<br><b>(Check for last three Cases)</b>         |                  |         |
| 8.  | Line list (Outbreak data)<br><b>(Check for outbreak in the last six months)</b>                           |                  |         |
| 9.  | Bulletin or surveillance summary report<br><b>(Check for last one month)</b>                              |                  |         |
| 10. | Supportive supervision report or feedback<br><b>(Check for the last six months)</b>                       |                  |         |
| 11. | Outbreak report<br><b>(Check for the last six months)</b>                                                 |                  |         |

### Part II: Availability of surveillance formats

Check for availability of the following formats either as hard copy or soft copy.

|     | Type of surveillance report                                                                            | Availability |    | Comment                            |
|-----|--------------------------------------------------------------------------------------------------------|--------------|----|------------------------------------|
|     |                                                                                                        | Yes          | No |                                    |
| 12. | Weekly reporting Form                                                                                  |              |    |                                    |
| 13. | Case based form (General)                                                                              |              |    |                                    |
| 14. | Case based form (AFP)                                                                                  |              |    |                                    |
| 15. | Case based form (Guinea Worm)                                                                          |              |    |                                    |
| 16. | Case based form (Maternal Death)                                                                       |              |    |                                    |
| 17. | Maternal Death Verbal Autopsy Form                                                                     |              |    |                                    |
| 18. | Maternal Death Facility Based Abstraction Form                                                         |              |    |                                    |
| 19. | Case based form (Perinatal Death)                                                                      |              |    |                                    |
| 20. | Case based form (Influenza)                                                                            |              |    |                                    |
| 21. | Line list                                                                                              |              |    |                                    |
| 22. | Case Based Laboratory Reporting Form                                                                   |              |    |                                    |
| 23. | Daily Epidemic Reporting Form                                                                          |              |    |                                    |
| 24. | List of Notifiable Diseases                                                                            |              |    |                                    |
| 25. | Rumor Log Book (In the comment column write number of rumors/events registered in the last six months) |              |    | Number= _____ in the last 6 months |
| 26. | Supportive Supervision Checklist                                                                       |              |    |                                    |

**Part III: Completeness of Selected Reports**

| No                                          | Item                                                                                                                                                              | Completeness                                                                                                                                                                                                                                                                                                                                                                                                                                                                                                                                                                                                                                                                                                      | Comments        |     |    |                                           |  |  |                                    |  |  |                                  |  |  |                                 |  |  |                             |  |  |                                             |  |  |                   |  |  |                       |  |  |                                             |  |  |  |
|---------------------------------------------|-------------------------------------------------------------------------------------------------------------------------------------------------------------------|-------------------------------------------------------------------------------------------------------------------------------------------------------------------------------------------------------------------------------------------------------------------------------------------------------------------------------------------------------------------------------------------------------------------------------------------------------------------------------------------------------------------------------------------------------------------------------------------------------------------------------------------------------------------------------------------------------------------|-----------------|-----|----|-------------------------------------------|--|--|------------------------------------|--|--|----------------------------------|--|--|---------------------------------|--|--|-----------------------------|--|--|---------------------------------------------|--|--|-------------------|--|--|-----------------------|--|--|---------------------------------------------|--|--|--|
| 27.                                         | <p><b>Bulletin or Surveillance Report:</b><br/>Check for the most recent weekly bulletin or surveillance report and give response for a-g</p>                     | <table border="1"> <thead> <tr> <th>Is it complete?</th> <th>Yes</th> <th>No</th> </tr> </thead> <tbody> <tr> <td>a. Woreda background</td> <td></td> <td></td> </tr> <tr> <td>b. Trend of diseases in line graph</td> <td></td> <td></td> </tr> <tr> <td>c. Completeness</td> <td></td> <td></td> </tr> <tr> <td>d. Timeliness</td> <td></td> <td></td> </tr> <tr> <td>e. Explanation of the trend</td> <td></td> <td></td> </tr> <tr> <td>f. Actions taken</td> <td></td> <td></td> </tr> <tr> <td>g. Recommendation</td> <td></td> <td></td> </tr> </tbody> </table>                                                                                                                                           | Is it complete? | Yes | No | a. Woreda background                      |  |  | b. Trend of diseases in line graph |  |  | c. Completeness                  |  |  | d. Timeliness                   |  |  | e. Explanation of the trend |  |  | f. Actions taken                            |  |  | g. Recommendation |  |  |                       |  |  |                                             |  |  |  |
| Is it complete?                             | Yes                                                                                                                                                               | No                                                                                                                                                                                                                                                                                                                                                                                                                                                                                                                                                                                                                                                                                                                |                 |     |    |                                           |  |  |                                    |  |  |                                  |  |  |                                 |  |  |                             |  |  |                                             |  |  |                   |  |  |                       |  |  |                                             |  |  |  |
| a. Woreda background                        |                                                                                                                                                                   |                                                                                                                                                                                                                                                                                                                                                                                                                                                                                                                                                                                                                                                                                                                   |                 |     |    |                                           |  |  |                                    |  |  |                                  |  |  |                                 |  |  |                             |  |  |                                             |  |  |                   |  |  |                       |  |  |                                             |  |  |  |
| b. Trend of diseases in line graph          |                                                                                                                                                                   |                                                                                                                                                                                                                                                                                                                                                                                                                                                                                                                                                                                                                                                                                                                   |                 |     |    |                                           |  |  |                                    |  |  |                                  |  |  |                                 |  |  |                             |  |  |                                             |  |  |                   |  |  |                       |  |  |                                             |  |  |  |
| c. Completeness                             |                                                                                                                                                                   |                                                                                                                                                                                                                                                                                                                                                                                                                                                                                                                                                                                                                                                                                                                   |                 |     |    |                                           |  |  |                                    |  |  |                                  |  |  |                                 |  |  |                             |  |  |                                             |  |  |                   |  |  |                       |  |  |                                             |  |  |  |
| d. Timeliness                               |                                                                                                                                                                   |                                                                                                                                                                                                                                                                                                                                                                                                                                                                                                                                                                                                                                                                                                                   |                 |     |    |                                           |  |  |                                    |  |  |                                  |  |  |                                 |  |  |                             |  |  |                                             |  |  |                   |  |  |                       |  |  |                                             |  |  |  |
| e. Explanation of the trend                 |                                                                                                                                                                   |                                                                                                                                                                                                                                                                                                                                                                                                                                                                                                                                                                                                                                                                                                                   |                 |     |    |                                           |  |  |                                    |  |  |                                  |  |  |                                 |  |  |                             |  |  |                                             |  |  |                   |  |  |                       |  |  |                                             |  |  |  |
| f. Actions taken                            |                                                                                                                                                                   |                                                                                                                                                                                                                                                                                                                                                                                                                                                                                                                                                                                                                                                                                                                   |                 |     |    |                                           |  |  |                                    |  |  |                                  |  |  |                                 |  |  |                             |  |  |                                             |  |  |                   |  |  |                       |  |  |                                             |  |  |  |
| g. Recommendation                           |                                                                                                                                                                   |                                                                                                                                                                                                                                                                                                                                                                                                                                                                                                                                                                                                                                                                                                                   |                 |     |    |                                           |  |  |                                    |  |  |                                  |  |  |                                 |  |  |                             |  |  |                                             |  |  |                   |  |  |                       |  |  |                                             |  |  |  |
| 28.                                         | <p><b>Weekly report forms:</b><br/>Check for the most recent filled weekly reporting format for the woreda and give response for a-f</p>                          | <table border="1"> <thead> <tr> <th>Is it complete?</th> <th>Yes</th> <th>No</th> </tr> </thead> <tbody> <tr> <td>a. Region, zone and woreda</td> <td></td> <td></td> </tr> <tr> <td>b. Epi week starting &amp; ending date</td> <td></td> <td></td> </tr> <tr> <td>c. Data filling complete</td> <td></td> <td></td> </tr> <tr> <td>d. HF completeness filled</td> <td></td> <td></td> </tr> <tr> <td>e. Zero report filled</td> <td></td> <td></td> </tr> <tr> <td>f. Name and telephone of reporting official</td> <td></td> <td></td> </tr> </tbody> </table>                                                                                                                                                 | Is it complete? | Yes | No | a. Region, zone and woreda                |  |  | b. Epi week starting & ending date |  |  | c. Data filling complete         |  |  | d. HF completeness filled       |  |  | e. Zero report filled       |  |  | f. Name and telephone of reporting official |  |  |                   |  |  |                       |  |  |                                             |  |  |  |
| Is it complete?                             | Yes                                                                                                                                                               | No                                                                                                                                                                                                                                                                                                                                                                                                                                                                                                                                                                                                                                                                                                                |                 |     |    |                                           |  |  |                                    |  |  |                                  |  |  |                                 |  |  |                             |  |  |                                             |  |  |                   |  |  |                       |  |  |                                             |  |  |  |
| a. Region, zone and woreda                  |                                                                                                                                                                   |                                                                                                                                                                                                                                                                                                                                                                                                                                                                                                                                                                                                                                                                                                                   |                 |     |    |                                           |  |  |                                    |  |  |                                  |  |  |                                 |  |  |                             |  |  |                                             |  |  |                   |  |  |                       |  |  |                                             |  |  |  |
| b. Epi week starting & ending date          |                                                                                                                                                                   |                                                                                                                                                                                                                                                                                                                                                                                                                                                                                                                                                                                                                                                                                                                   |                 |     |    |                                           |  |  |                                    |  |  |                                  |  |  |                                 |  |  |                             |  |  |                                             |  |  |                   |  |  |                       |  |  |                                             |  |  |  |
| c. Data filling complete                    |                                                                                                                                                                   |                                                                                                                                                                                                                                                                                                                                                                                                                                                                                                                                                                                                                                                                                                                   |                 |     |    |                                           |  |  |                                    |  |  |                                  |  |  |                                 |  |  |                             |  |  |                                             |  |  |                   |  |  |                       |  |  |                                             |  |  |  |
| d. HF completeness filled                   |                                                                                                                                                                   |                                                                                                                                                                                                                                                                                                                                                                                                                                                                                                                                                                                                                                                                                                                   |                 |     |    |                                           |  |  |                                    |  |  |                                  |  |  |                                 |  |  |                             |  |  |                                             |  |  |                   |  |  |                       |  |  |                                             |  |  |  |
| e. Zero report filled                       |                                                                                                                                                                   |                                                                                                                                                                                                                                                                                                                                                                                                                                                                                                                                                                                                                                                                                                                   |                 |     |    |                                           |  |  |                                    |  |  |                                  |  |  |                                 |  |  |                             |  |  |                                             |  |  |                   |  |  |                       |  |  |                                             |  |  |  |
| f. Name and telephone of reporting official |                                                                                                                                                                   |                                                                                                                                                                                                                                                                                                                                                                                                                                                                                                                                                                                                                                                                                                                   |                 |     |    |                                           |  |  |                                    |  |  |                                  |  |  |                                 |  |  |                             |  |  |                                             |  |  |                   |  |  |                       |  |  |                                             |  |  |  |
| 29.                                         | <p><b>Case based report forms</b><br/>Check for the latest filled case based reporting form and give response for a-h</p>                                         | <table border="1"> <thead> <tr> <th>Is it complete?</th> <th>Yes</th> <th>No</th> </tr> </thead> <tbody> <tr> <td>a. Reporting health facility</td> <td></td> <td></td> </tr> <tr> <td>b. Woreda/zone/region</td> <td></td> <td></td> </tr> <tr> <td>c. Specific disease or condition</td> <td></td> <td></td> </tr> <tr> <td>d. Date of onset of the disease</td> <td></td> <td></td> </tr> <tr> <td>e. Age</td> <td></td> <td></td> </tr> <tr> <td>f. Sex</td> <td></td> <td></td> </tr> <tr> <td>g. Outcome</td> <td></td> <td></td> </tr> <tr> <td>h. Lab specimen taken</td> <td></td> <td></td> </tr> <tr> <td>i. Name and telephone of reporting official</td> <td></td> <td></td> </tr> </tbody> </table> | Is it complete? | Yes | No | a. Reporting health facility              |  |  | b. Woreda/zone/region              |  |  | c. Specific disease or condition |  |  | d. Date of onset of the disease |  |  | e. Age                      |  |  | f. Sex                                      |  |  | g. Outcome        |  |  | h. Lab specimen taken |  |  | i. Name and telephone of reporting official |  |  |  |
| Is it complete?                             | Yes                                                                                                                                                               | No                                                                                                                                                                                                                                                                                                                                                                                                                                                                                                                                                                                                                                                                                                                |                 |     |    |                                           |  |  |                                    |  |  |                                  |  |  |                                 |  |  |                             |  |  |                                             |  |  |                   |  |  |                       |  |  |                                             |  |  |  |
| a. Reporting health facility                |                                                                                                                                                                   |                                                                                                                                                                                                                                                                                                                                                                                                                                                                                                                                                                                                                                                                                                                   |                 |     |    |                                           |  |  |                                    |  |  |                                  |  |  |                                 |  |  |                             |  |  |                                             |  |  |                   |  |  |                       |  |  |                                             |  |  |  |
| b. Woreda/zone/region                       |                                                                                                                                                                   |                                                                                                                                                                                                                                                                                                                                                                                                                                                                                                                                                                                                                                                                                                                   |                 |     |    |                                           |  |  |                                    |  |  |                                  |  |  |                                 |  |  |                             |  |  |                                             |  |  |                   |  |  |                       |  |  |                                             |  |  |  |
| c. Specific disease or condition            |                                                                                                                                                                   |                                                                                                                                                                                                                                                                                                                                                                                                                                                                                                                                                                                                                                                                                                                   |                 |     |    |                                           |  |  |                                    |  |  |                                  |  |  |                                 |  |  |                             |  |  |                                             |  |  |                   |  |  |                       |  |  |                                             |  |  |  |
| d. Date of onset of the disease             |                                                                                                                                                                   |                                                                                                                                                                                                                                                                                                                                                                                                                                                                                                                                                                                                                                                                                                                   |                 |     |    |                                           |  |  |                                    |  |  |                                  |  |  |                                 |  |  |                             |  |  |                                             |  |  |                   |  |  |                       |  |  |                                             |  |  |  |
| e. Age                                      |                                                                                                                                                                   |                                                                                                                                                                                                                                                                                                                                                                                                                                                                                                                                                                                                                                                                                                                   |                 |     |    |                                           |  |  |                                    |  |  |                                  |  |  |                                 |  |  |                             |  |  |                                             |  |  |                   |  |  |                       |  |  |                                             |  |  |  |
| f. Sex                                      |                                                                                                                                                                   |                                                                                                                                                                                                                                                                                                                                                                                                                                                                                                                                                                                                                                                                                                                   |                 |     |    |                                           |  |  |                                    |  |  |                                  |  |  |                                 |  |  |                             |  |  |                                             |  |  |                   |  |  |                       |  |  |                                             |  |  |  |
| g. Outcome                                  |                                                                                                                                                                   |                                                                                                                                                                                                                                                                                                                                                                                                                                                                                                                                                                                                                                                                                                                   |                 |     |    |                                           |  |  |                                    |  |  |                                  |  |  |                                 |  |  |                             |  |  |                                             |  |  |                   |  |  |                       |  |  |                                             |  |  |  |
| h. Lab specimen taken                       |                                                                                                                                                                   |                                                                                                                                                                                                                                                                                                                                                                                                                                                                                                                                                                                                                                                                                                                   |                 |     |    |                                           |  |  |                                    |  |  |                                  |  |  |                                 |  |  |                             |  |  |                                             |  |  |                   |  |  |                       |  |  |                                             |  |  |  |
| i. Name and telephone of reporting official |                                                                                                                                                                   |                                                                                                                                                                                                                                                                                                                                                                                                                                                                                                                                                                                                                                                                                                                   |                 |     |    |                                           |  |  |                                    |  |  |                                  |  |  |                                 |  |  |                             |  |  |                                             |  |  |                   |  |  |                       |  |  |                                             |  |  |  |
| 30.                                         | <p><b>Graph Computed from Surveillance Data</b><br/>Check for the most recent graph produced from summary report of outbreak report and give response for a-d</p> | <table border="1"> <thead> <tr> <th>Is it complete?</th> <th>Yes</th> <th>No</th> </tr> </thead> <tbody> <tr> <td>a. Title (what, when, where)</td> <td></td> <td></td> </tr> <tr> <td>b. X-axis label</td> <td></td> <td></td> </tr> <tr> <td>c. Y-axis label</td> <td></td> <td></td> </tr> <tr> <td>d. Legend (if applicable)</td> <td></td> <td></td> </tr> </tbody> </table>                                                                                                                                                                                                                                                                                                                                 | Is it complete? | Yes | No | a. Title (what, when, where)              |  |  | b. X-axis label                    |  |  | c. Y-axis label                  |  |  | d. Legend (if applicable)       |  |  |                             |  |  |                                             |  |  |                   |  |  |                       |  |  |                                             |  |  |  |
| Is it complete?                             | Yes                                                                                                                                                               | No                                                                                                                                                                                                                                                                                                                                                                                                                                                                                                                                                                                                                                                                                                                |                 |     |    |                                           |  |  |                                    |  |  |                                  |  |  |                                 |  |  |                             |  |  |                                             |  |  |                   |  |  |                       |  |  |                                             |  |  |  |
| a. Title (what, when, where)                |                                                                                                                                                                   |                                                                                                                                                                                                                                                                                                                                                                                                                                                                                                                                                                                                                                                                                                                   |                 |     |    |                                           |  |  |                                    |  |  |                                  |  |  |                                 |  |  |                             |  |  |                                             |  |  |                   |  |  |                       |  |  |                                             |  |  |  |
| b. X-axis label                             |                                                                                                                                                                   |                                                                                                                                                                                                                                                                                                                                                                                                                                                                                                                                                                                                                                                                                                                   |                 |     |    |                                           |  |  |                                    |  |  |                                  |  |  |                                 |  |  |                             |  |  |                                             |  |  |                   |  |  |                       |  |  |                                             |  |  |  |
| c. Y-axis label                             |                                                                                                                                                                   |                                                                                                                                                                                                                                                                                                                                                                                                                                                                                                                                                                                                                                                                                                                   |                 |     |    |                                           |  |  |                                    |  |  |                                  |  |  |                                 |  |  |                             |  |  |                                             |  |  |                   |  |  |                       |  |  |                                             |  |  |  |
| d. Legend (if applicable)                   |                                                                                                                                                                   |                                                                                                                                                                                                                                                                                                                                                                                                                                                                                                                                                                                                                                                                                                                   |                 |     |    |                                           |  |  |                                    |  |  |                                  |  |  |                                 |  |  |                             |  |  |                                             |  |  |                   |  |  |                       |  |  |                                             |  |  |  |
| 31.                                         | <p><b>Computer Utilization</b><br/>Check for availability of the following if there is a computer in use by the PHEM officer</p>                                  | <table border="1"> <thead> <tr> <th>Is it complete?</th> <th>Yes</th> <th>No</th> </tr> </thead> <tbody> <tr> <td>a. MS Excel surveillance data or linelist</td> <td></td> <td></td> </tr> <tr> <td>b. Graphs in MS Excel</td> <td></td> <td></td> </tr> <tr> <td>c. Report in MS Word</td> <td></td> <td></td> </tr> <tr> <td>d. Presentation in MS PPT</td> <td></td> <td></td> </tr> </tbody> </table>                                                                                                                                                                                                                                                                                                         | Is it complete? | Yes | No | a. MS Excel surveillance data or linelist |  |  | b. Graphs in MS Excel              |  |  | c. Report in MS Word             |  |  | d. Presentation in MS PPT       |  |  |                             |  |  |                                             |  |  |                   |  |  |                       |  |  |                                             |  |  |  |
| Is it complete?                             | Yes                                                                                                                                                               | No                                                                                                                                                                                                                                                                                                                                                                                                                                                                                                                                                                                                                                                                                                                |                 |     |    |                                           |  |  |                                    |  |  |                                  |  |  |                                 |  |  |                             |  |  |                                             |  |  |                   |  |  |                       |  |  |                                             |  |  |  |
| a. MS Excel surveillance data or linelist   |                                                                                                                                                                   |                                                                                                                                                                                                                                                                                                                                                                                                                                                                                                                                                                                                                                                                                                                   |                 |     |    |                                           |  |  |                                    |  |  |                                  |  |  |                                 |  |  |                             |  |  |                                             |  |  |                   |  |  |                       |  |  |                                             |  |  |  |
| b. Graphs in MS Excel                       |                                                                                                                                                                   |                                                                                                                                                                                                                                                                                                                                                                                                                                                                                                                                                                                                                                                                                                                   |                 |     |    |                                           |  |  |                                    |  |  |                                  |  |  |                                 |  |  |                             |  |  |                                             |  |  |                   |  |  |                       |  |  |                                             |  |  |  |
| c. Report in MS Word                        |                                                                                                                                                                   |                                                                                                                                                                                                                                                                                                                                                                                                                                                                                                                                                                                                                                                                                                                   |                 |     |    |                                           |  |  |                                    |  |  |                                  |  |  |                                 |  |  |                             |  |  |                                             |  |  |                   |  |  |                       |  |  |                                             |  |  |  |
| d. Presentation in MS PPT                   |                                                                                                                                                                   |                                                                                                                                                                                                                                                                                                                                                                                                                                                                                                                                                                                                                                                                                                                   |                 |     |    |                                           |  |  |                                    |  |  |                                  |  |  |                                 |  |  |                             |  |  |                                             |  |  |                   |  |  |                       |  |  |                                             |  |  |  |

| 32.                                                        | <p><b>Outbreak Report</b><br/>Check for availability of the following if there is an outbreak report</p> | <table border="1"> <thead> <tr> <th data-bbox="527 184 1117 212">Does the report indicate/discuss?</th> <th data-bbox="1122 184 1192 212">Yes</th> <th data-bbox="1196 184 1284 212">No</th> </tr> </thead> <tbody> <tr> <td data-bbox="527 218 1117 245">a. Woreda background</td> <td data-bbox="1122 218 1192 245"></td> <td data-bbox="1196 218 1284 245"></td> </tr> <tr> <td data-bbox="527 252 1117 279">b. Disease information</td> <td data-bbox="1122 252 1192 279"></td> <td data-bbox="1196 252 1284 279"></td> </tr> <tr> <td data-bbox="527 285 1117 312">c. Case definition</td> <td data-bbox="1122 285 1192 312"></td> <td data-bbox="1196 285 1284 312"></td> </tr> <tr> <td data-bbox="527 319 1117 346">d. Lab confirmation status</td> <td data-bbox="1122 319 1192 346"></td> <td data-bbox="1196 319 1284 346"></td> </tr> <tr> <td data-bbox="527 352 1117 380">e. Descriptive stat (Mean, median, mode)</td> <td data-bbox="1122 352 1192 380"></td> <td data-bbox="1196 352 1284 380"></td> </tr> <tr> <td data-bbox="527 386 1117 413">f. Descriptive by Person (Age and Sex)</td> <td data-bbox="1122 386 1192 413"></td> <td data-bbox="1196 386 1284 413"></td> </tr> <tr> <td data-bbox="527 420 1117 485">g. Descriptive by Time (days or weeks), onset and end date</td> <td data-bbox="1122 420 1192 485"></td> <td data-bbox="1196 420 1284 485"></td> </tr> <tr> <td data-bbox="527 491 1117 556">h. Descriptive by place (Health Facility or Kebele)</td> <td data-bbox="1122 491 1192 556"></td> <td data-bbox="1196 491 1284 556"></td> </tr> <tr> <td data-bbox="527 562 1117 590">i. Outbreak curve</td> <td data-bbox="1122 562 1192 590"></td> <td data-bbox="1196 562 1284 590"></td> </tr> <tr> <td data-bbox="527 596 1117 623">j. Attack rate</td> <td data-bbox="1122 596 1192 623"></td> <td data-bbox="1196 596 1284 623"></td> </tr> <tr> <td data-bbox="527 630 1117 657">k. Measures of association (RR, OR)</td> <td data-bbox="1122 630 1192 657"></td> <td data-bbox="1196 630 1284 657"></td> </tr> <tr> <td data-bbox="527 663 1117 690">l. Actions taken</td> <td data-bbox="1122 663 1192 690"></td> <td data-bbox="1196 663 1284 690"></td> </tr> <tr> <td data-bbox="527 697 1117 724">m. Recommendations</td> <td data-bbox="1122 697 1192 724"></td> <td data-bbox="1196 697 1284 724"></td> </tr> </tbody> </table> | Does the report indicate/discuss? | Yes | No | a. Woreda background |  |  | b. Disease information |  |  | c. Case definition |  |  | d. Lab confirmation status |  |  | e. Descriptive stat (Mean, median, mode) |  |  | f. Descriptive by Person (Age and Sex) |  |  | g. Descriptive by Time (days or weeks), onset and end date |  |  | h. Descriptive by place (Health Facility or Kebele) |  |  | i. Outbreak curve |  |  | j. Attack rate |  |  | k. Measures of association (RR, OR) |  |  | l. Actions taken |  |  | m. Recommendations |  |  |  |
|------------------------------------------------------------|----------------------------------------------------------------------------------------------------------|--------------------------------------------------------------------------------------------------------------------------------------------------------------------------------------------------------------------------------------------------------------------------------------------------------------------------------------------------------------------------------------------------------------------------------------------------------------------------------------------------------------------------------------------------------------------------------------------------------------------------------------------------------------------------------------------------------------------------------------------------------------------------------------------------------------------------------------------------------------------------------------------------------------------------------------------------------------------------------------------------------------------------------------------------------------------------------------------------------------------------------------------------------------------------------------------------------------------------------------------------------------------------------------------------------------------------------------------------------------------------------------------------------------------------------------------------------------------------------------------------------------------------------------------------------------------------------------------------------------------------------------------------------------------------------------------------------------------------------------------------------------------------------------------------------------------------------------------------------------------------------------------------------------------------------------------------------------------------------------------------------------------------------------------------------------------------------------------------------------------------------------------------------------------------------------------------------------------------------------------------------------------------------------------------------------------------------------------------------------------------------------|-----------------------------------|-----|----|----------------------|--|--|------------------------|--|--|--------------------|--|--|----------------------------|--|--|------------------------------------------|--|--|----------------------------------------|--|--|------------------------------------------------------------|--|--|-----------------------------------------------------|--|--|-------------------|--|--|----------------|--|--|-------------------------------------|--|--|------------------|--|--|--------------------|--|--|--|
| Does the report indicate/discuss?                          | Yes                                                                                                      | No                                                                                                                                                                                                                                                                                                                                                                                                                                                                                                                                                                                                                                                                                                                                                                                                                                                                                                                                                                                                                                                                                                                                                                                                                                                                                                                                                                                                                                                                                                                                                                                                                                                                                                                                                                                                                                                                                                                                                                                                                                                                                                                                                                                                                                                                                                                                                                                   |                                   |     |    |                      |  |  |                        |  |  |                    |  |  |                            |  |  |                                          |  |  |                                        |  |  |                                                            |  |  |                                                     |  |  |                   |  |  |                |  |  |                                     |  |  |                  |  |  |                    |  |  |  |
| a. Woreda background                                       |                                                                                                          |                                                                                                                                                                                                                                                                                                                                                                                                                                                                                                                                                                                                                                                                                                                                                                                                                                                                                                                                                                                                                                                                                                                                                                                                                                                                                                                                                                                                                                                                                                                                                                                                                                                                                                                                                                                                                                                                                                                                                                                                                                                                                                                                                                                                                                                                                                                                                                                      |                                   |     |    |                      |  |  |                        |  |  |                    |  |  |                            |  |  |                                          |  |  |                                        |  |  |                                                            |  |  |                                                     |  |  |                   |  |  |                |  |  |                                     |  |  |                  |  |  |                    |  |  |  |
| b. Disease information                                     |                                                                                                          |                                                                                                                                                                                                                                                                                                                                                                                                                                                                                                                                                                                                                                                                                                                                                                                                                                                                                                                                                                                                                                                                                                                                                                                                                                                                                                                                                                                                                                                                                                                                                                                                                                                                                                                                                                                                                                                                                                                                                                                                                                                                                                                                                                                                                                                                                                                                                                                      |                                   |     |    |                      |  |  |                        |  |  |                    |  |  |                            |  |  |                                          |  |  |                                        |  |  |                                                            |  |  |                                                     |  |  |                   |  |  |                |  |  |                                     |  |  |                  |  |  |                    |  |  |  |
| c. Case definition                                         |                                                                                                          |                                                                                                                                                                                                                                                                                                                                                                                                                                                                                                                                                                                                                                                                                                                                                                                                                                                                                                                                                                                                                                                                                                                                                                                                                                                                                                                                                                                                                                                                                                                                                                                                                                                                                                                                                                                                                                                                                                                                                                                                                                                                                                                                                                                                                                                                                                                                                                                      |                                   |     |    |                      |  |  |                        |  |  |                    |  |  |                            |  |  |                                          |  |  |                                        |  |  |                                                            |  |  |                                                     |  |  |                   |  |  |                |  |  |                                     |  |  |                  |  |  |                    |  |  |  |
| d. Lab confirmation status                                 |                                                                                                          |                                                                                                                                                                                                                                                                                                                                                                                                                                                                                                                                                                                                                                                                                                                                                                                                                                                                                                                                                                                                                                                                                                                                                                                                                                                                                                                                                                                                                                                                                                                                                                                                                                                                                                                                                                                                                                                                                                                                                                                                                                                                                                                                                                                                                                                                                                                                                                                      |                                   |     |    |                      |  |  |                        |  |  |                    |  |  |                            |  |  |                                          |  |  |                                        |  |  |                                                            |  |  |                                                     |  |  |                   |  |  |                |  |  |                                     |  |  |                  |  |  |                    |  |  |  |
| e. Descriptive stat (Mean, median, mode)                   |                                                                                                          |                                                                                                                                                                                                                                                                                                                                                                                                                                                                                                                                                                                                                                                                                                                                                                                                                                                                                                                                                                                                                                                                                                                                                                                                                                                                                                                                                                                                                                                                                                                                                                                                                                                                                                                                                                                                                                                                                                                                                                                                                                                                                                                                                                                                                                                                                                                                                                                      |                                   |     |    |                      |  |  |                        |  |  |                    |  |  |                            |  |  |                                          |  |  |                                        |  |  |                                                            |  |  |                                                     |  |  |                   |  |  |                |  |  |                                     |  |  |                  |  |  |                    |  |  |  |
| f. Descriptive by Person (Age and Sex)                     |                                                                                                          |                                                                                                                                                                                                                                                                                                                                                                                                                                                                                                                                                                                                                                                                                                                                                                                                                                                                                                                                                                                                                                                                                                                                                                                                                                                                                                                                                                                                                                                                                                                                                                                                                                                                                                                                                                                                                                                                                                                                                                                                                                                                                                                                                                                                                                                                                                                                                                                      |                                   |     |    |                      |  |  |                        |  |  |                    |  |  |                            |  |  |                                          |  |  |                                        |  |  |                                                            |  |  |                                                     |  |  |                   |  |  |                |  |  |                                     |  |  |                  |  |  |                    |  |  |  |
| g. Descriptive by Time (days or weeks), onset and end date |                                                                                                          |                                                                                                                                                                                                                                                                                                                                                                                                                                                                                                                                                                                                                                                                                                                                                                                                                                                                                                                                                                                                                                                                                                                                                                                                                                                                                                                                                                                                                                                                                                                                                                                                                                                                                                                                                                                                                                                                                                                                                                                                                                                                                                                                                                                                                                                                                                                                                                                      |                                   |     |    |                      |  |  |                        |  |  |                    |  |  |                            |  |  |                                          |  |  |                                        |  |  |                                                            |  |  |                                                     |  |  |                   |  |  |                |  |  |                                     |  |  |                  |  |  |                    |  |  |  |
| h. Descriptive by place (Health Facility or Kebele)        |                                                                                                          |                                                                                                                                                                                                                                                                                                                                                                                                                                                                                                                                                                                                                                                                                                                                                                                                                                                                                                                                                                                                                                                                                                                                                                                                                                                                                                                                                                                                                                                                                                                                                                                                                                                                                                                                                                                                                                                                                                                                                                                                                                                                                                                                                                                                                                                                                                                                                                                      |                                   |     |    |                      |  |  |                        |  |  |                    |  |  |                            |  |  |                                          |  |  |                                        |  |  |                                                            |  |  |                                                     |  |  |                   |  |  |                |  |  |                                     |  |  |                  |  |  |                    |  |  |  |
| i. Outbreak curve                                          |                                                                                                          |                                                                                                                                                                                                                                                                                                                                                                                                                                                                                                                                                                                                                                                                                                                                                                                                                                                                                                                                                                                                                                                                                                                                                                                                                                                                                                                                                                                                                                                                                                                                                                                                                                                                                                                                                                                                                                                                                                                                                                                                                                                                                                                                                                                                                                                                                                                                                                                      |                                   |     |    |                      |  |  |                        |  |  |                    |  |  |                            |  |  |                                          |  |  |                                        |  |  |                                                            |  |  |                                                     |  |  |                   |  |  |                |  |  |                                     |  |  |                  |  |  |                    |  |  |  |
| j. Attack rate                                             |                                                                                                          |                                                                                                                                                                                                                                                                                                                                                                                                                                                                                                                                                                                                                                                                                                                                                                                                                                                                                                                                                                                                                                                                                                                                                                                                                                                                                                                                                                                                                                                                                                                                                                                                                                                                                                                                                                                                                                                                                                                                                                                                                                                                                                                                                                                                                                                                                                                                                                                      |                                   |     |    |                      |  |  |                        |  |  |                    |  |  |                            |  |  |                                          |  |  |                                        |  |  |                                                            |  |  |                                                     |  |  |                   |  |  |                |  |  |                                     |  |  |                  |  |  |                    |  |  |  |
| k. Measures of association (RR, OR)                        |                                                                                                          |                                                                                                                                                                                                                                                                                                                                                                                                                                                                                                                                                                                                                                                                                                                                                                                                                                                                                                                                                                                                                                                                                                                                                                                                                                                                                                                                                                                                                                                                                                                                                                                                                                                                                                                                                                                                                                                                                                                                                                                                                                                                                                                                                                                                                                                                                                                                                                                      |                                   |     |    |                      |  |  |                        |  |  |                    |  |  |                            |  |  |                                          |  |  |                                        |  |  |                                                            |  |  |                                                     |  |  |                   |  |  |                |  |  |                                     |  |  |                  |  |  |                    |  |  |  |
| l. Actions taken                                           |                                                                                                          |                                                                                                                                                                                                                                                                                                                                                                                                                                                                                                                                                                                                                                                                                                                                                                                                                                                                                                                                                                                                                                                                                                                                                                                                                                                                                                                                                                                                                                                                                                                                                                                                                                                                                                                                                                                                                                                                                                                                                                                                                                                                                                                                                                                                                                                                                                                                                                                      |                                   |     |    |                      |  |  |                        |  |  |                    |  |  |                            |  |  |                                          |  |  |                                        |  |  |                                                            |  |  |                                                     |  |  |                   |  |  |                |  |  |                                     |  |  |                  |  |  |                    |  |  |  |
| m. Recommendations                                         |                                                                                                          |                                                                                                                                                                                                                                                                                                                                                                                                                                                                                                                                                                                                                                                                                                                                                                                                                                                                                                                                                                                                                                                                                                                                                                                                                                                                                                                                                                                                                                                                                                                                                                                                                                                                                                                                                                                                                                                                                                                                                                                                                                                                                                                                                                                                                                                                                                                                                                                      |                                   |     |    |                      |  |  |                        |  |  |                    |  |  |                            |  |  |                                          |  |  |                                        |  |  |                                                            |  |  |                                                     |  |  |                   |  |  |                |  |  |                                     |  |  |                  |  |  |                    |  |  |  |
